# Supplementary material
Source: publisher figshare collection journal article supplement (https://frontiersin.figshare.com/ndownloader/files/33305075)
Supplement: Supplementary file 1 [file 33305075]

## ***Supplementary Material***

### **Author Statement**

This document features supplemental material referred to in the scientific publication:

Reski N, Alissandrakis A and Kerren A (2021) An Empirical Evaluation of Asymmetric Synchronous Collaboration Combining Immersive and Non-Immersive Interfaces Within the Context of Immersive Analytics. *Front. Virtual Real.* 2:743445. doi: 10.3389/frvir.2021.743445

### **1 SPATIO-TEMPORAL COLLABORATION QUESTIONNAIRE**

The questionnaire, as provided to the user study participants, is included in Figures S1 and S2.

### **2 OTHER STUDY MATERIAL**

#### **2.1 Study Scenario**

The instructions for the user study, as provided to the participants, are included in Figure S3.

#### **2.2 Answer and Observation Sheets**

The answer sheet, as provided to the non-immersive interface users, for the fruits scenario is included in Figure S4 and for the veggies scenario in Figure S5. The observation sheet used by the non-immersive interface user to write down any worthwhile notes is included in Figure S6.

### **3 SUPPLEMENTARY ANALYSIS**

#### **3.1 Audio Activity Analysis**

Separate audio stream recordings of the participant pair were processed using Audacity and its *Sound Finder* tool (with default settings) to determine when the participants were speaking during their sessions. Figures S7 to S16 visualize this verbal activity. Furthermore, system log data were processed to determine when the two users shared the same context (were at the same location at the same time in both interfaces), and this information is additionally visualized and included in each figure.

#### **3.2 Pathway Visualization**

Figures S17 to S21 show the pathway visualizations illustrating the spatial exploration of both users, i.e., location movements, over time (3D) for all task sessions. An interactive version of all pathway visualizations is available online as a web application: [vxar.lnu.se/apps/2021-frivr/](http://vxar.lnu.se/apps/2021-frivr/).

## Synchronous Asymmetric Interaction within the Context of Collaborative Immersive Analytics

### Questionnaire: Collaboration

**Instructions:** For each of the following dimensions [TSIA, NC, SC, AO], read carefully its definition, and for the questions / statements, mark one box that best describes your reactions to the tested application today.

#### Application

- ☐ Virtual Reality Application.  
☐ Desktop Application.

#### Session

Date/Time: \_\_\_\_\_  
Task: ☐ Fruits ☐ Vegetables

**[TSIA] Transitions between Shared and Individual Activities:** The interplay between individual and group efforts, including the ability to switch between these, within the scope of collaborative work.

- TSIA.1 How many of your efforts during this task would you consider to have been *individual* efforts?
- none      a few      some      a lot      every
- — ○ — ○ — ○ — ○
- TSIA.2 How many of your efforts during this task would you consider to have been *group* efforts?
- none      a few      some      a lot      every
- — ○ — ○ — ○ — ○
- TSIA.3 According to your impression, who was more in a leading / directing role during the *group* efforts?
- mostly other      more other, some me      both equally      more me, some other      mostly me
- — ○ — ○ — ○ — ○

**[NC] Negotiation and Communication:** Verbal conversation (i.e., talk) facilitated through the ability of utilizing nonverbal information cues in order to discuss and interpret any task-related aspects of the activity (e.g., findings in the data, roles and structure of task approach, and so on).

- NC.1 According to your impression, how often did you communicate *verbally* to your partner?
- never      rarely      sometimes      often      constantly
- — ○ — ○ — ○ — ○
- NC.2 According to your impression, how often did you communicate *nonverbally* to your partner?
- never      rarely      sometimes      often      constantly
- — ○ — ○ — ○ — ○
- NC.3 How often would you consider did *dialog* take place?
- never      rarely      sometimes      often      constantly
- — ○ — ○ — ○ — ○
- NC.4 How often would you consider did *negotiation* take place?
- never      rarely      sometimes      often      constantly
- — ○ — ○ — ○ — ○
- NC.5 Who would you say mostly initiated the *negotiations*?
- mostly other      more other, some me      both equally      more me, some other      mostly me
- — ○ — ○ — ○ — ○

Please continue on the next page.

**Figure S1.** Page 1 of the Spatio-Temporal Collaboration Questionnaire as presented to the participants in our user interaction study.

**[SC] Sharing Context:** Characteristics and features of the shared space that facilitate and support focused and unfocused collaborative work, leading to shared understandings.

- |      |                                                                                                 |                                                                                                                                                                                                                                                                                                                                                                                                        |
|------|-------------------------------------------------------------------------------------------------|--------------------------------------------------------------------------------------------------------------------------------------------------------------------------------------------------------------------------------------------------------------------------------------------------------------------------------------------------------------------------------------------------------|
| SC.1 | The collaborative features of the system allowed me to focus on the same subject as my partner. | <div style="display: flex; justify-content: space-between; font-size: 0.8em;"> <span>strongly disagree</span> <span>disagree</span> <span>neutral</span> <span>agree</span> <span>strongly agree</span> </div> <div style="display: flex; align-items: center; margin-top: 5px;"> <input type="radio"/> <input type="radio"/> <input type="radio"/> <input type="radio"/> <input type="radio"/> </div> |
| SC.2 | The collaborative features of the system allowed me to establish a dialog with my partner.      | <div style="display: flex; justify-content: space-between; font-size: 0.8em;"> <span>strongly disagree</span> <span>disagree</span> <span>neutral</span> <span>agree</span> <span>strongly agree</span> </div> <div style="display: flex; align-items: center; margin-top: 5px;"> <input type="radio"/> <input type="radio"/> <input type="radio"/> <input type="radio"/> <input type="radio"/> </div> |
| SC.3 | The collaborative features of the system distracted me from my <i>individual</i> efforts.       | <div style="display: flex; justify-content: space-between; font-size: 0.8em;"> <span>strongly disagree</span> <span>disagree</span> <span>neutral</span> <span>agree</span> <span>strongly agree</span> </div> <div style="display: flex; align-items: center; margin-top: 5px;"> <input type="radio"/> <input type="radio"/> <input type="radio"/> <input type="radio"/> <input type="radio"/> </div> |

**[AO] Awareness of Others:** The ability to understand your partner's activity during times of (1) focused collaboration and active communication (i.e., *group* efforts), as well as (2) more independent and *individual* work.

- |      |                                                                                                                          |                                                                                                                                                                                                                                                                                                                                                                                   |
|------|--------------------------------------------------------------------------------------------------------------------------|-----------------------------------------------------------------------------------------------------------------------------------------------------------------------------------------------------------------------------------------------------------------------------------------------------------------------------------------------------------------------------------|
| AO.1 | During your <i>group</i> efforts, how much were you aware of your partner's activities?                                  | <div style="display: flex; justify-content: space-between; font-size: 0.8em;"> <span>not at all</span> <span>a bit</span> <span>some</span> <span>a lot</span> <span>always</span> </div> <div style="display: flex; align-items: center; margin-top: 5px;"> <input type="radio"/> <input type="radio"/> <input type="radio"/> <input type="radio"/> <input type="radio"/> </div> |
| AO.2 | During your <i>group</i> efforts, how much were you aware of your partner's location in space?                           | <div style="display: flex; justify-content: space-between; font-size: 0.8em;"> <span>not at all</span> <span>a bit</span> <span>some</span> <span>a lot</span> <span>always</span> </div> <div style="display: flex; align-items: center; margin-top: 5px;"> <input type="radio"/> <input type="radio"/> <input type="radio"/> <input type="radio"/> <input type="radio"/> </div> |
| AO.3 | During your <i>group</i> efforts, how much were you aware of your partner's time reference (time point / interval)?      | <div style="display: flex; justify-content: space-between; font-size: 0.8em;"> <span>not at all</span> <span>a bit</span> <span>some</span> <span>a lot</span> <span>always</span> </div> <div style="display: flex; align-items: center; margin-top: 5px;"> <input type="radio"/> <input type="radio"/> <input type="radio"/> <input type="radio"/> <input type="radio"/> </div> |
| AO.4 | During your <i>individual</i> efforts, how much were you aware of your partner's activities?                             | <div style="display: flex; justify-content: space-between; font-size: 0.8em;"> <span>not at all</span> <span>a bit</span> <span>some</span> <span>a lot</span> <span>always</span> </div> <div style="display: flex; align-items: center; margin-top: 5px;"> <input type="radio"/> <input type="radio"/> <input type="radio"/> <input type="radio"/> <input type="radio"/> </div> |
| AO.5 | During your <i>individual</i> efforts, how much were you aware of your partner's location in space?                      | <div style="display: flex; justify-content: space-between; font-size: 0.8em;"> <span>not at all</span> <span>a bit</span> <span>some</span> <span>a lot</span> <span>always</span> </div> <div style="display: flex; align-items: center; margin-top: 5px;"> <input type="radio"/> <input type="radio"/> <input type="radio"/> <input type="radio"/> <input type="radio"/> </div> |
| AO.6 | During your <i>individual</i> efforts, how much were you aware of your partner's time reference (time point / interval)? | <div style="display: flex; justify-content: space-between; font-size: 0.8em;"> <span>not at all</span> <span>a bit</span> <span>some</span> <span>a lot</span> <span>always</span> </div> <div style="display: flex; align-items: center; margin-top: 5px;"> <input type="radio"/> <input type="radio"/> <input type="radio"/> <input type="radio"/> <input type="radio"/> </div> |

**Figure S2.** Page 2 of the Spatio-Temporal Collaboration Questionnaire as presented to the participants in our user interaction study.

**Disclaimer:** The presented scenario and task are fictional, and have been exclusively created for the study you are participating in.

**Scenario:** It is the year 2X42. A series of scientific and technological advances made it possible to travel through the quantum realm. The exploration of many different variants of our dear Mother Earth followed in the years after. You are a two-person science team responsible for one such expedition. While one of you specializes on the collection and analysis of weather data, such as for instance sunlight and humidity levels, the other is an expert in the study and observation of plants, such as different types of fruits and vegetables.

After a joint excursion through the quantum realm during which you collected 150 days worth of data from different locations all over, what appears to be, the European landmass, you are now back in your research lab. Using the (non-immersive) weather terminal as well as the (immersive) plant exploration environment, you are ready to together take a closer look and make sense of your collected data.

**Task:** Your superintendent asked you for a report on the collected data. Collaboratively explore the collected weather and plant data in space and time, and use the provided tools to make assessments that describe the relationship between each plant and the two weather variables (sunlight and humidity). In short, based on your observations, determine the type of correlation between each weather and plant data, and additionally indicate how confident you are with those assessments. To support your conclusions, you should better write down noteworthy observations along the way.

**Further Information:**

- A correlation refers to the relationship between two variables.
- A positive correlation indicates that when one variable is increasing, the other variable is increasing as well. Or, when one variable is decreasing, the other variable is decreasing as well.
- A negative correlation indicates that when one variable is increasing, the other variable is decreasing (and vice versa).
- No correlation would indicate that when one variable is increasing, the other might be increasing, decreasing, or remain unchanged with equal probability.
- If you cannot determine the type of correlation based on your observations, please indicate so.
- You can assume that the location does not affect the correlations. A relationship between a weather variable and a plant would be the same across the planet, no matter the specific geographic location.

**Figure S3.** The instruction page with the scenario task provided to the study participants.

## Synchronous Asymmetric Interaction within the context of Collaborative Immersive Analytics

Session - Date / Time: \_\_\_\_\_

**Correlation:** Based on your joint data exploration, please make assessments that describe the relationship between *fruit and sunlight*, as well as *fruit and humidity*.

**Confidence:** How *sure / confident* are you with your correlation assessment?

| Fruit          | Sunlight                                                                                                |                                                                                                                                          | Humidity                                                                                                |                                                                                                                                          |
|----------------|---------------------------------------------------------------------------------------------------------|------------------------------------------------------------------------------------------------------------------------------------------|---------------------------------------------------------------------------------------------------------|------------------------------------------------------------------------------------------------------------------------------------------|
|                | Correlation                                                                                             | Confidence                                                                                                                               | Correlation                                                                                             | Confidence                                                                                                                               |
| <i>Apples</i>  | <input type="checkbox"/> Positive<br><input type="checkbox"/> None<br><input type="checkbox"/> Negative | <input type="checkbox"/> Do not know<br><input type="checkbox"/> Low<br><input type="checkbox"/> Medium<br><input type="checkbox"/> High | <input type="checkbox"/> Positive<br><input type="checkbox"/> None<br><input type="checkbox"/> Negative | <input type="checkbox"/> Do not know<br><input type="checkbox"/> Low<br><input type="checkbox"/> Medium<br><input type="checkbox"/> High |
| <i>Oranges</i> | <input type="checkbox"/> Positive<br><input type="checkbox"/> None<br><input type="checkbox"/> Negative | <input type="checkbox"/> Do not know<br><input type="checkbox"/> Low<br><input type="checkbox"/> Medium<br><input type="checkbox"/> High | <input type="checkbox"/> Positive<br><input type="checkbox"/> None<br><input type="checkbox"/> Negative | <input type="checkbox"/> Do not know<br><input type="checkbox"/> Low<br><input type="checkbox"/> Medium<br><input type="checkbox"/> High |
| <i>Bananas</i> | <input type="checkbox"/> Positive<br><input type="checkbox"/> None<br><input type="checkbox"/> Negative | <input type="checkbox"/> Do not know<br><input type="checkbox"/> Low<br><input type="checkbox"/> Medium<br><input type="checkbox"/> High | <input type="checkbox"/> Positive<br><input type="checkbox"/> None<br><input type="checkbox"/> Negative | <input type="checkbox"/> Do not know<br><input type="checkbox"/> Low<br><input type="checkbox"/> Medium<br><input type="checkbox"/> High |
| <i>Berries</i> | <input type="checkbox"/> Positive<br><input type="checkbox"/> None<br><input type="checkbox"/> Negative | <input type="checkbox"/> Do not know<br><input type="checkbox"/> Low<br><input type="checkbox"/> Medium<br><input type="checkbox"/> High | <input type="checkbox"/> Positive<br><input type="checkbox"/> None<br><input type="checkbox"/> Negative | <input type="checkbox"/> Do not know<br><input type="checkbox"/> Low<br><input type="checkbox"/> Medium<br><input type="checkbox"/> High |
| <i>Grapes</i>  | <input type="checkbox"/> Positive<br><input type="checkbox"/> None<br><input type="checkbox"/> Negative | <input type="checkbox"/> Do not know<br><input type="checkbox"/> Low<br><input type="checkbox"/> Medium<br><input type="checkbox"/> High | <input type="checkbox"/> Positive<br><input type="checkbox"/> None<br><input type="checkbox"/> Negative | <input type="checkbox"/> Do not know<br><input type="checkbox"/> Low<br><input type="checkbox"/> Medium<br><input type="checkbox"/> High |

**Note:** Once both of you agree that you have finished your joint data exploration, please say aloud “*We are done with the data exploration.*”

**Figure S4.** The answer sheet provided to the non-immersive desktop interface participant to write down the correlations (for the fruits scenario).

## Synchronous Asymmetric Interaction within the context of Collaborative Immersive Analytics

Session - Date / Time: \_\_\_\_\_

**Correlation:** Based on your joint data exploration, please make assessments that describe the relationship between *vegetable and sunlight*, as well as *vegetable and humidity*.

**Confidence:** How *sure / confident* are you with your correlation assessment?

| Vegetable | Sunlight                                                                                                |                                                                                                                                          | Humidity                                                                                                |                                                                                                                                          |
|-----------|---------------------------------------------------------------------------------------------------------|------------------------------------------------------------------------------------------------------------------------------------------|---------------------------------------------------------------------------------------------------------|------------------------------------------------------------------------------------------------------------------------------------------|
|           | Correlation                                                                                             | Confidence                                                                                                                               | Correlation                                                                                             | Confidence                                                                                                                               |
| Tomatoes  | <input type="checkbox"/> Positive<br><input type="checkbox"/> None<br><input type="checkbox"/> Negative | <input type="checkbox"/> Do not know<br><input type="checkbox"/> Low<br><input type="checkbox"/> Medium<br><input type="checkbox"/> High | <input type="checkbox"/> Positive<br><input type="checkbox"/> None<br><input type="checkbox"/> Negative | <input type="checkbox"/> Do not know<br><input type="checkbox"/> Low<br><input type="checkbox"/> Medium<br><input type="checkbox"/> High |
| Carrots   | <input type="checkbox"/> Positive<br><input type="checkbox"/> None<br><input type="checkbox"/> Negative | <input type="checkbox"/> Do not know<br><input type="checkbox"/> Low<br><input type="checkbox"/> Medium<br><input type="checkbox"/> High | <input type="checkbox"/> Positive<br><input type="checkbox"/> None<br><input type="checkbox"/> Negative | <input type="checkbox"/> Do not know<br><input type="checkbox"/> Low<br><input type="checkbox"/> Medium<br><input type="checkbox"/> High |
| Potatoes  | <input type="checkbox"/> Positive<br><input type="checkbox"/> None<br><input type="checkbox"/> Negative | <input type="checkbox"/> Do not know<br><input type="checkbox"/> Low<br><input type="checkbox"/> Medium<br><input type="checkbox"/> High | <input type="checkbox"/> Positive<br><input type="checkbox"/> None<br><input type="checkbox"/> Negative | <input type="checkbox"/> Do not know<br><input type="checkbox"/> Low<br><input type="checkbox"/> Medium<br><input type="checkbox"/> High |
| Cabbages  | <input type="checkbox"/> Positive<br><input type="checkbox"/> None<br><input type="checkbox"/> Negative | <input type="checkbox"/> Do not know<br><input type="checkbox"/> Low<br><input type="checkbox"/> Medium<br><input type="checkbox"/> High | <input type="checkbox"/> Positive<br><input type="checkbox"/> None<br><input type="checkbox"/> Negative | <input type="checkbox"/> Do not know<br><input type="checkbox"/> Low<br><input type="checkbox"/> Medium<br><input type="checkbox"/> High |
| Lettuces  | <input type="checkbox"/> Positive<br><input type="checkbox"/> None<br><input type="checkbox"/> Negative | <input type="checkbox"/> Do not know<br><input type="checkbox"/> Low<br><input type="checkbox"/> Medium<br><input type="checkbox"/> High | <input type="checkbox"/> Positive<br><input type="checkbox"/> None<br><input type="checkbox"/> Negative | <input type="checkbox"/> Do not know<br><input type="checkbox"/> Low<br><input type="checkbox"/> Medium<br><input type="checkbox"/> High |

**Note:** Once both of you agree that you have finished your joint data exploration, please say aloud “We are done with the data exploration.”

**Figure S5.** The answer sheet provided to the non-immersive desktop interface participant to write down the correlations (for the vegetables scenario).

## Synchronous Asymmetric Interaction within the context of Collaborative Immersive Analytics

Session - Date / Time: \_\_\_\_\_

## Noteworthy Observations

| Location    | Time Event / Time Range | Plant | Sunlight                            | Humidity                            |
|-------------|-------------------------|-------|-------------------------------------|-------------------------------------|
| Japan       | day 23 - day 42         | Rice  | <input checked="" type="checkbox"/> | <input type="checkbox"/>            |
| New Zealand | day 45                  | Kiwis | <input type="checkbox"/>            | <input checked="" type="checkbox"/> |
|             |                         |       | <input type="checkbox"/>            | <input type="checkbox"/>            |
|             |                         |       | <input type="checkbox"/>            | <input type="checkbox"/>            |
|             |                         |       | <input type="checkbox"/>            | <input type="checkbox"/>            |
|             |                         |       | <input type="checkbox"/>            | <input type="checkbox"/>            |
|             |                         |       | <input type="checkbox"/>            | <input type="checkbox"/>            |
|             |                         |       | <input type="checkbox"/>            | <input type="checkbox"/>            |
|             |                         |       | <input type="checkbox"/>            | <input type="checkbox"/>            |
|             |                         |       | <input type="checkbox"/>            | <input type="checkbox"/>            |
|             |                         |       | <input type="checkbox"/>            | <input type="checkbox"/>            |
|             |                         |       | <input type="checkbox"/>            | <input type="checkbox"/>            |
|             |                         |       | <input type="checkbox"/>            | <input type="checkbox"/>            |
|             |                         |       | <input type="checkbox"/>            | <input type="checkbox"/>            |
|             |                         |       | <input type="checkbox"/>            | <input type="checkbox"/>            |
|             |                         |       | <input type="checkbox"/>            | <input type="checkbox"/>            |
|             |                         |       | <input type="checkbox"/>            | <input type="checkbox"/>            |
|             |                         |       | <input type="checkbox"/>            | <input type="checkbox"/>            |
|             |                         |       | <input type="checkbox"/>            | <input type="checkbox"/>            |
|             |                         |       | <input type="checkbox"/>            | <input type="checkbox"/>            |
|             |                         |       | <input type="checkbox"/>            | <input type="checkbox"/>            |

**Figure S6.** The sheet provided to the non-immersive desktop interface participant to note any observations (one copy for each scenario). The example locations and plants deliberately do not belong to any scenario datasets.

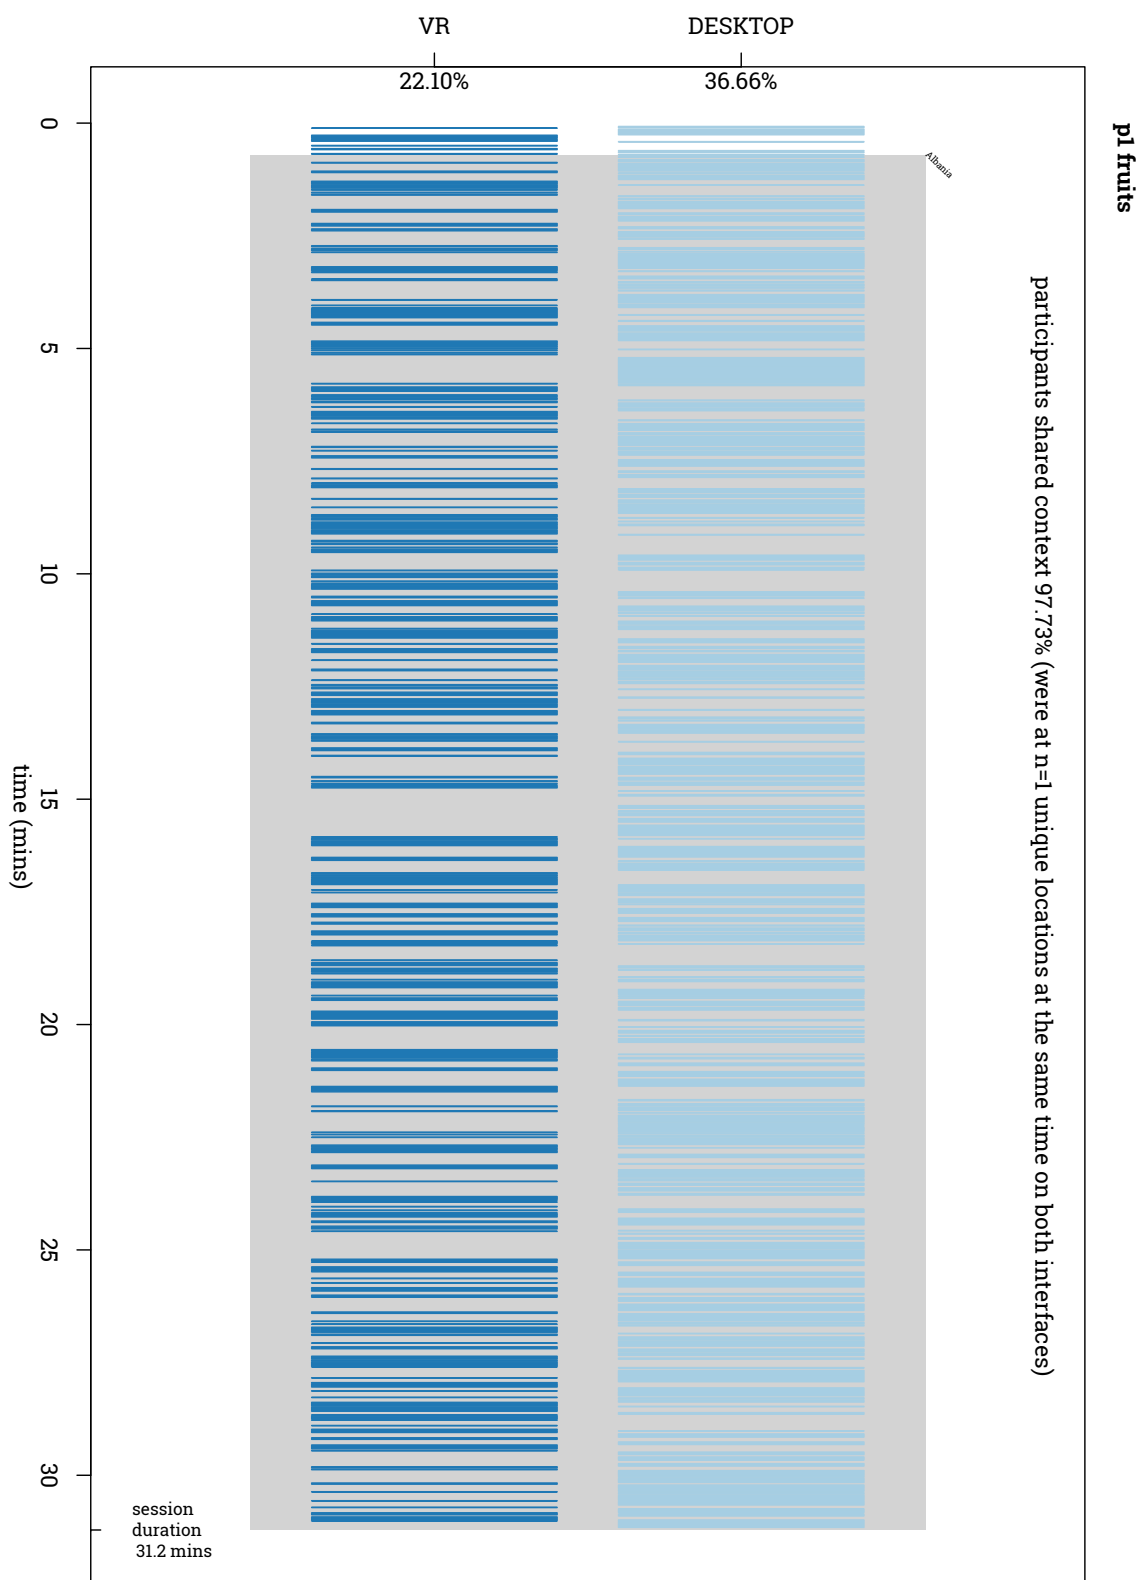

**Figure S7.** Audio activity and shared context analysis for the pair p1, fruits scenario. Dark and light blue rectangles indicate the detected audio activity by the immersive and non-immersive interface users, respectively. The shaded rectangles indicate that the participants were sharing the same context (were at the same location at the same time in both interfaces).



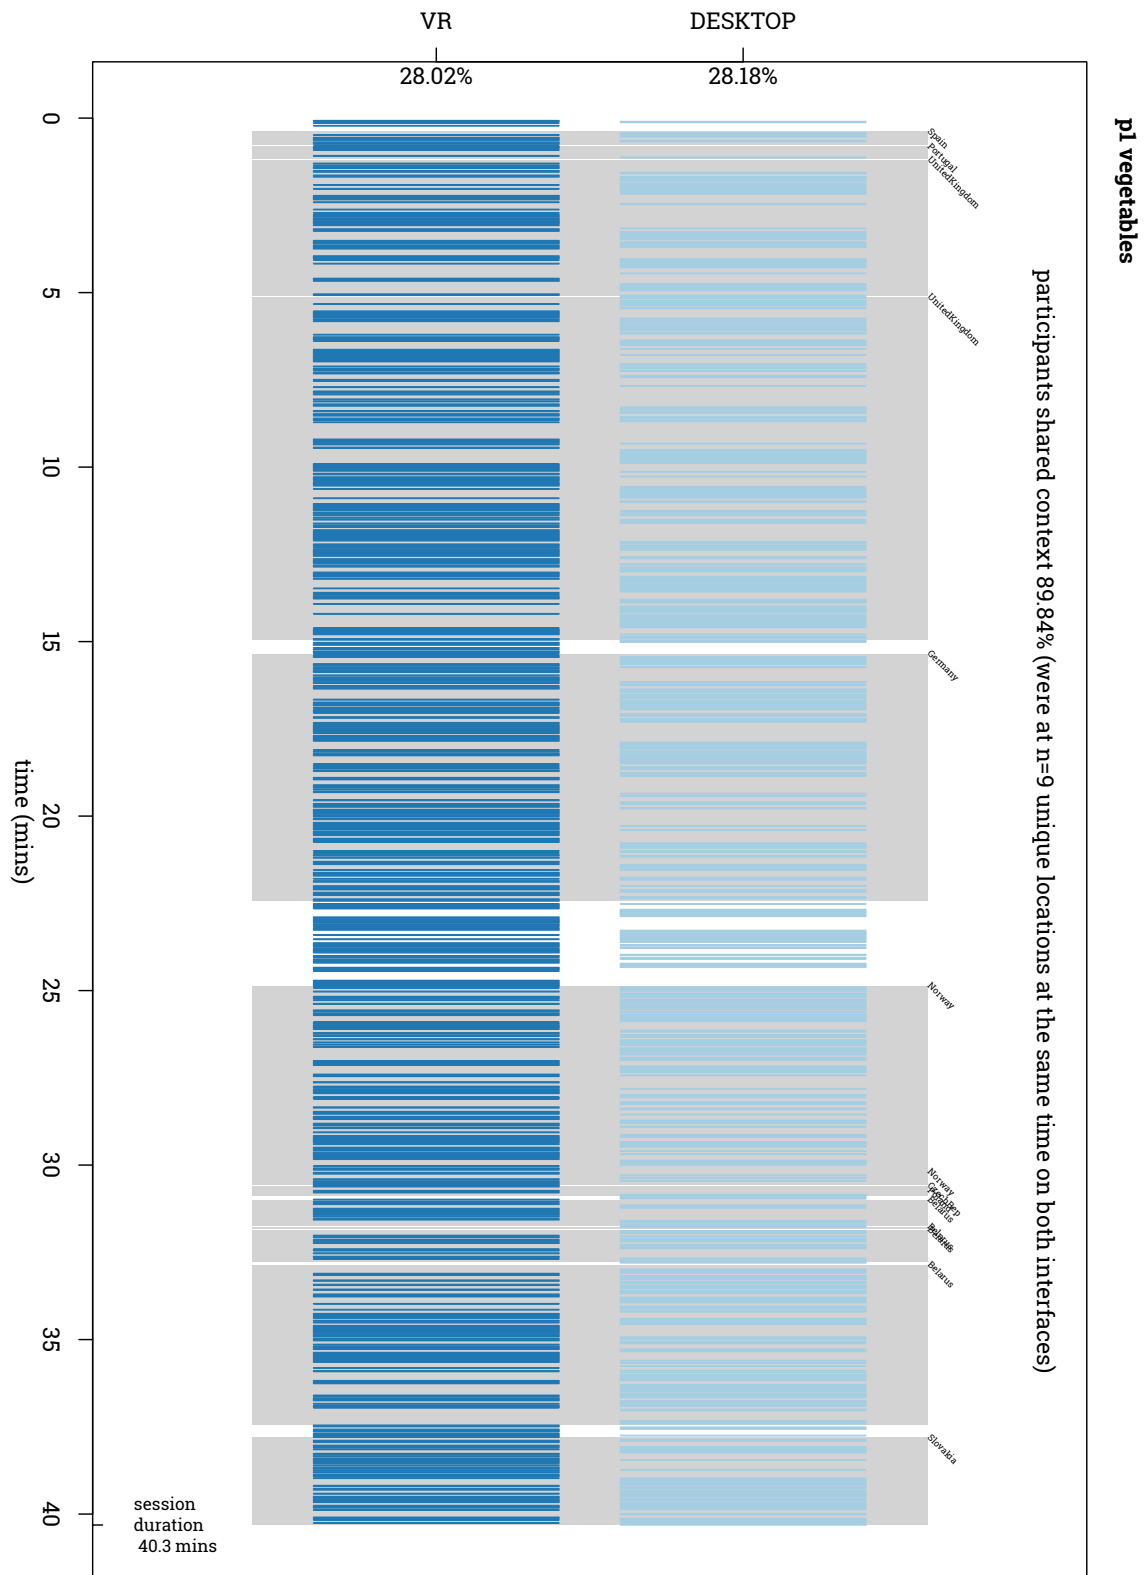

**Figure S8.** Audio activity and shared context analysis for the pair p1, veggies scenario. Dark and light blue rectangles indicate the detected audio activity by the immersive and non-immersive interface users, respectively. The shaded rectangles indicate that the participants were sharing the same context (were at the same location at the same time in both interfaces).

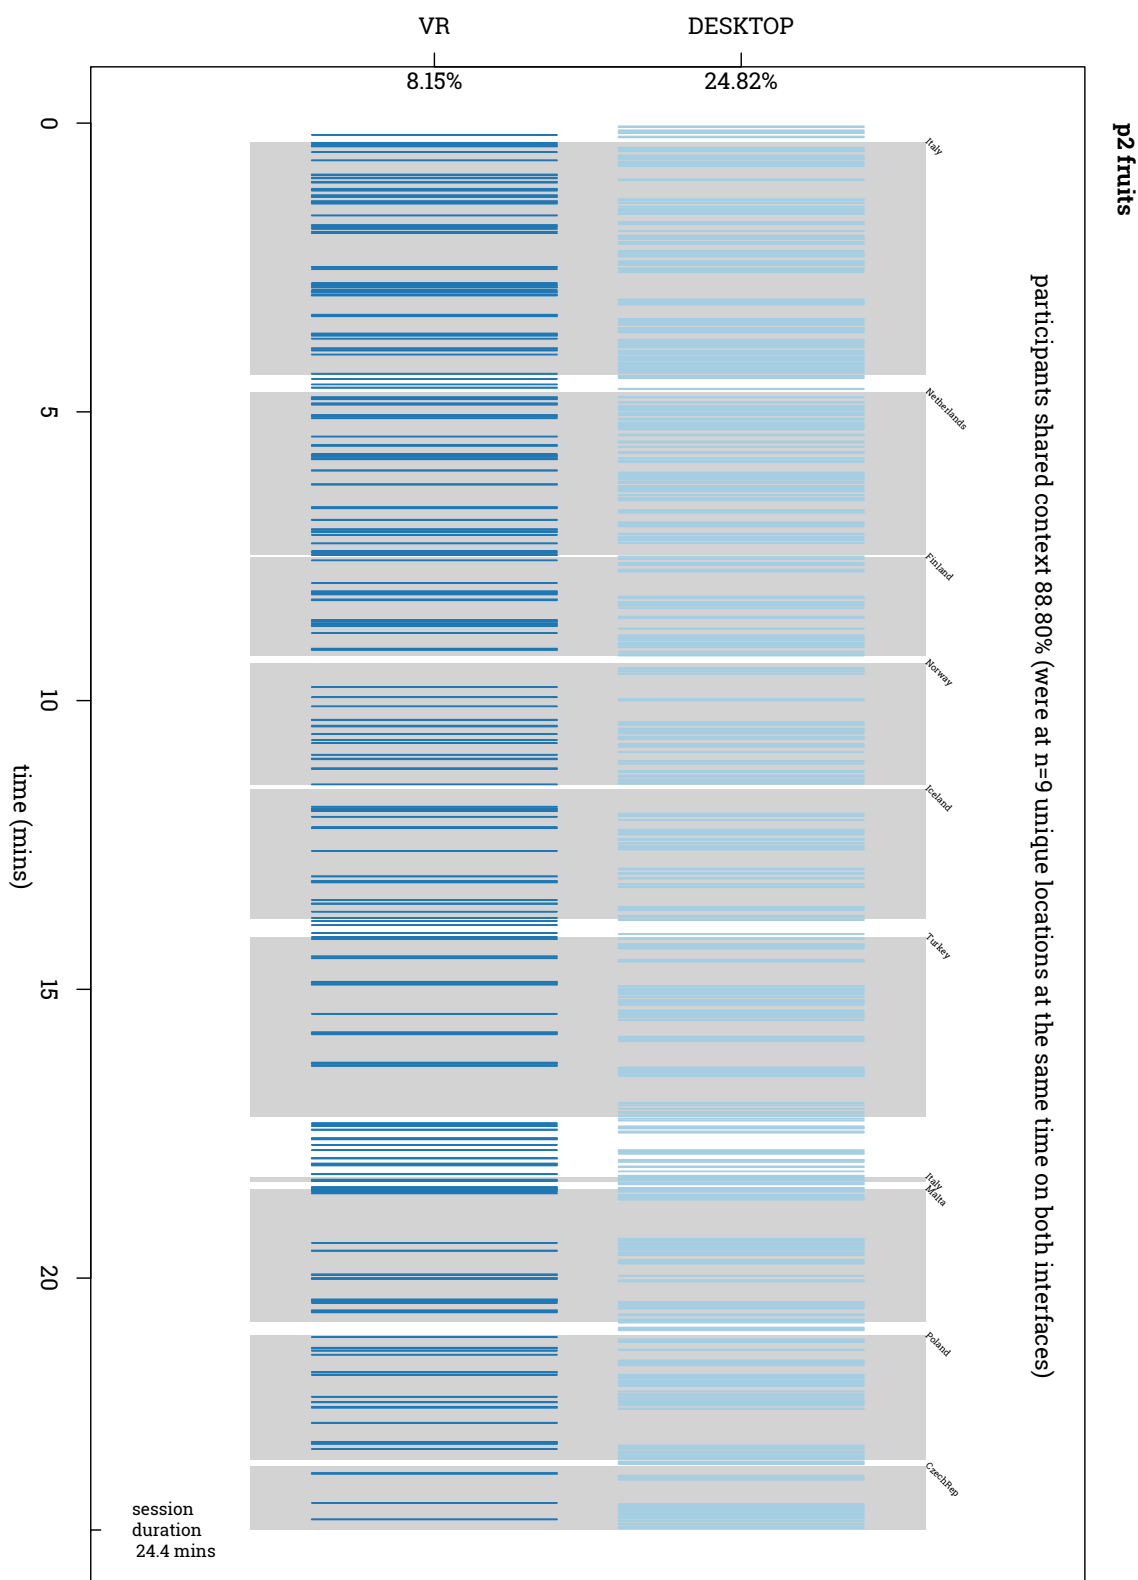

**Figure S9.** Audio activity and shared context analysis for the pair p2, fruits scenario. Dark and light blue rectangles indicate the detected audio activity by the immersive and non-immersive interface users, respectively. The shaded rectangles indicate that the participants were sharing the same context (were at the same location at the same time in both interfaces).

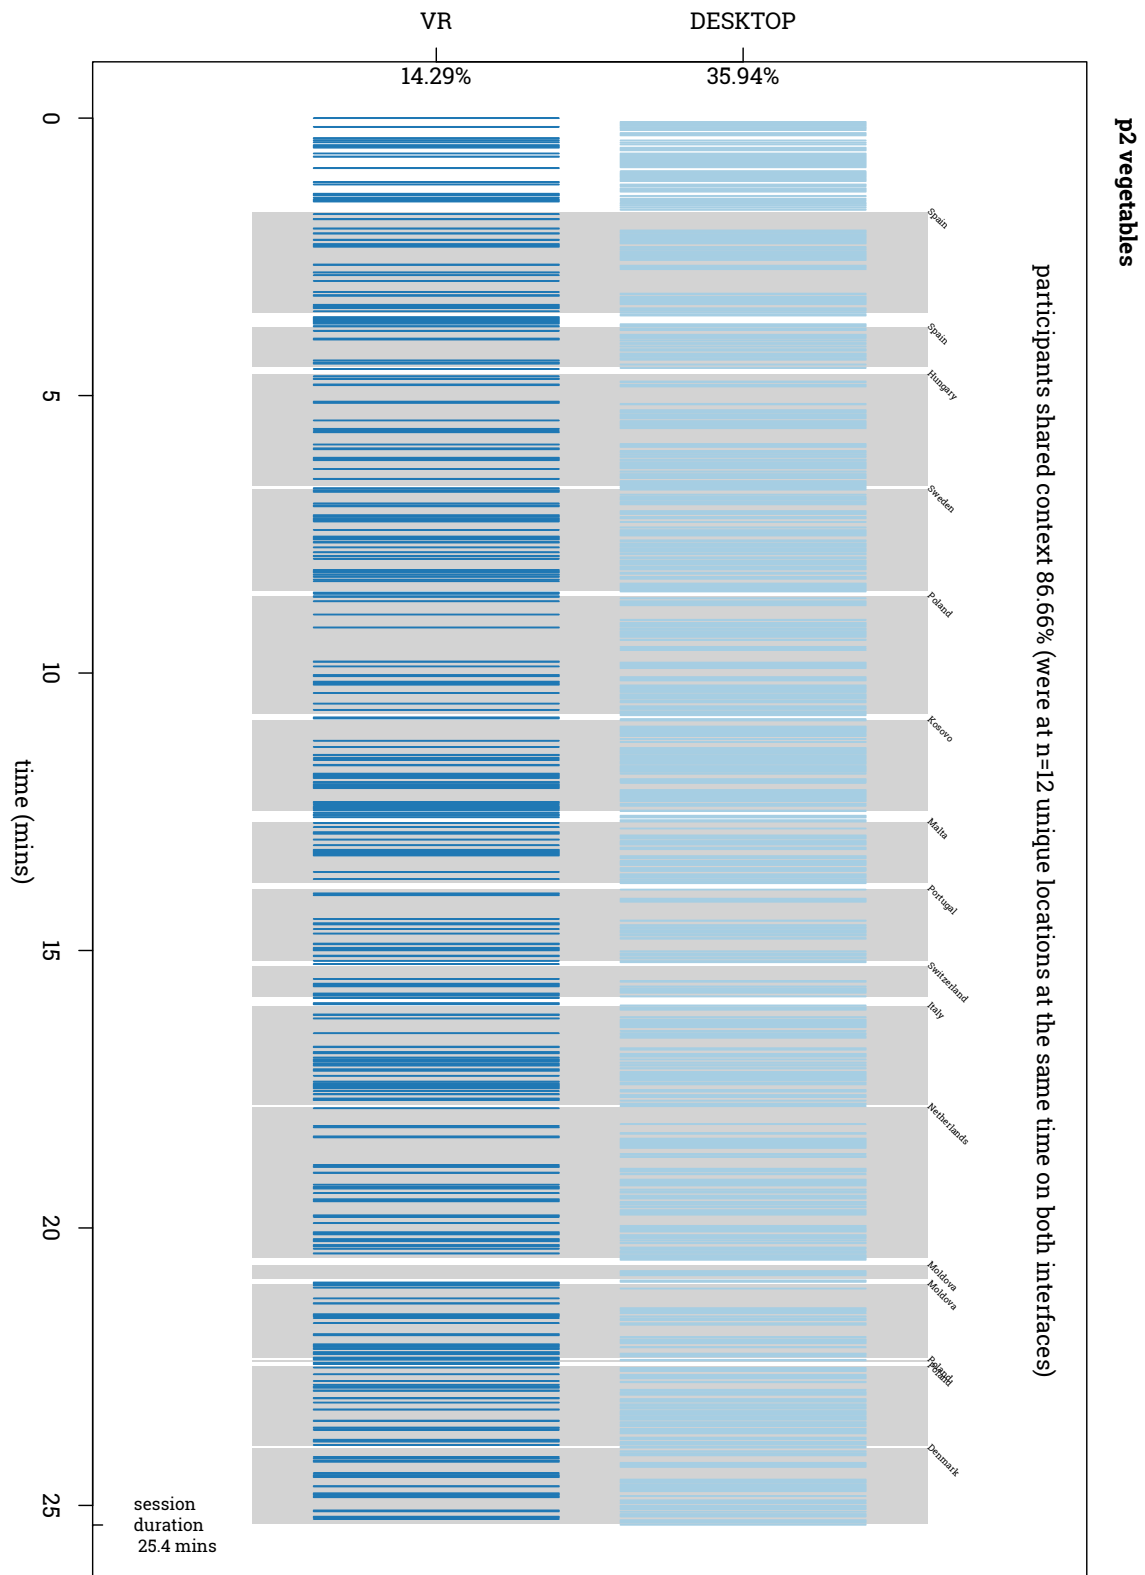

**Figure S10.** Audio activity and shared context analysis for the pair p2, veggies scenario. Dark and light blue rectangles indicate the detected audio activity by the immersive and non-immersive interface users, respectively. The shaded rectangles indicate that the participants were sharing the same context (were at the same location at the same time in both interfaces).

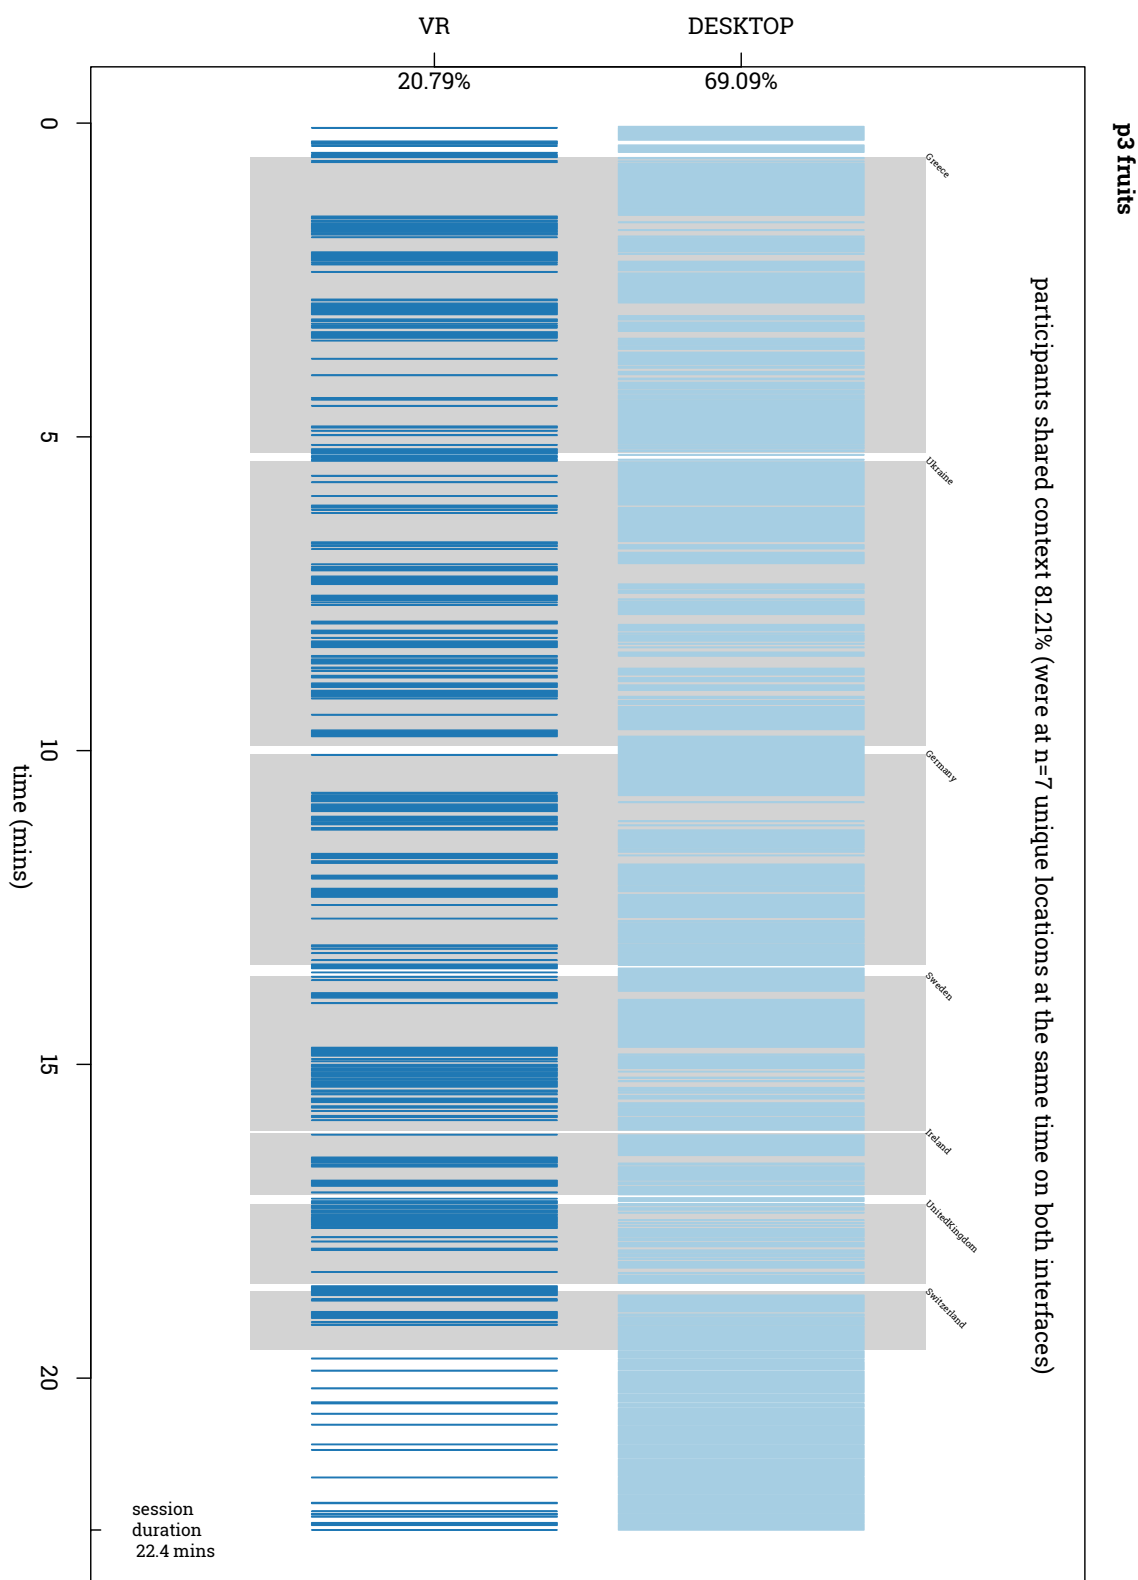

**Figure S11.** Audio activity and shared context analysis for the pair p3, fruits scenario. Dark and light blue rectangles indicate the detected audio activity by the immersive and non-immersive interface users, respectively. The shaded rectangles indicate that the participants were sharing the same context (were at the same location at the same time in both interfaces).

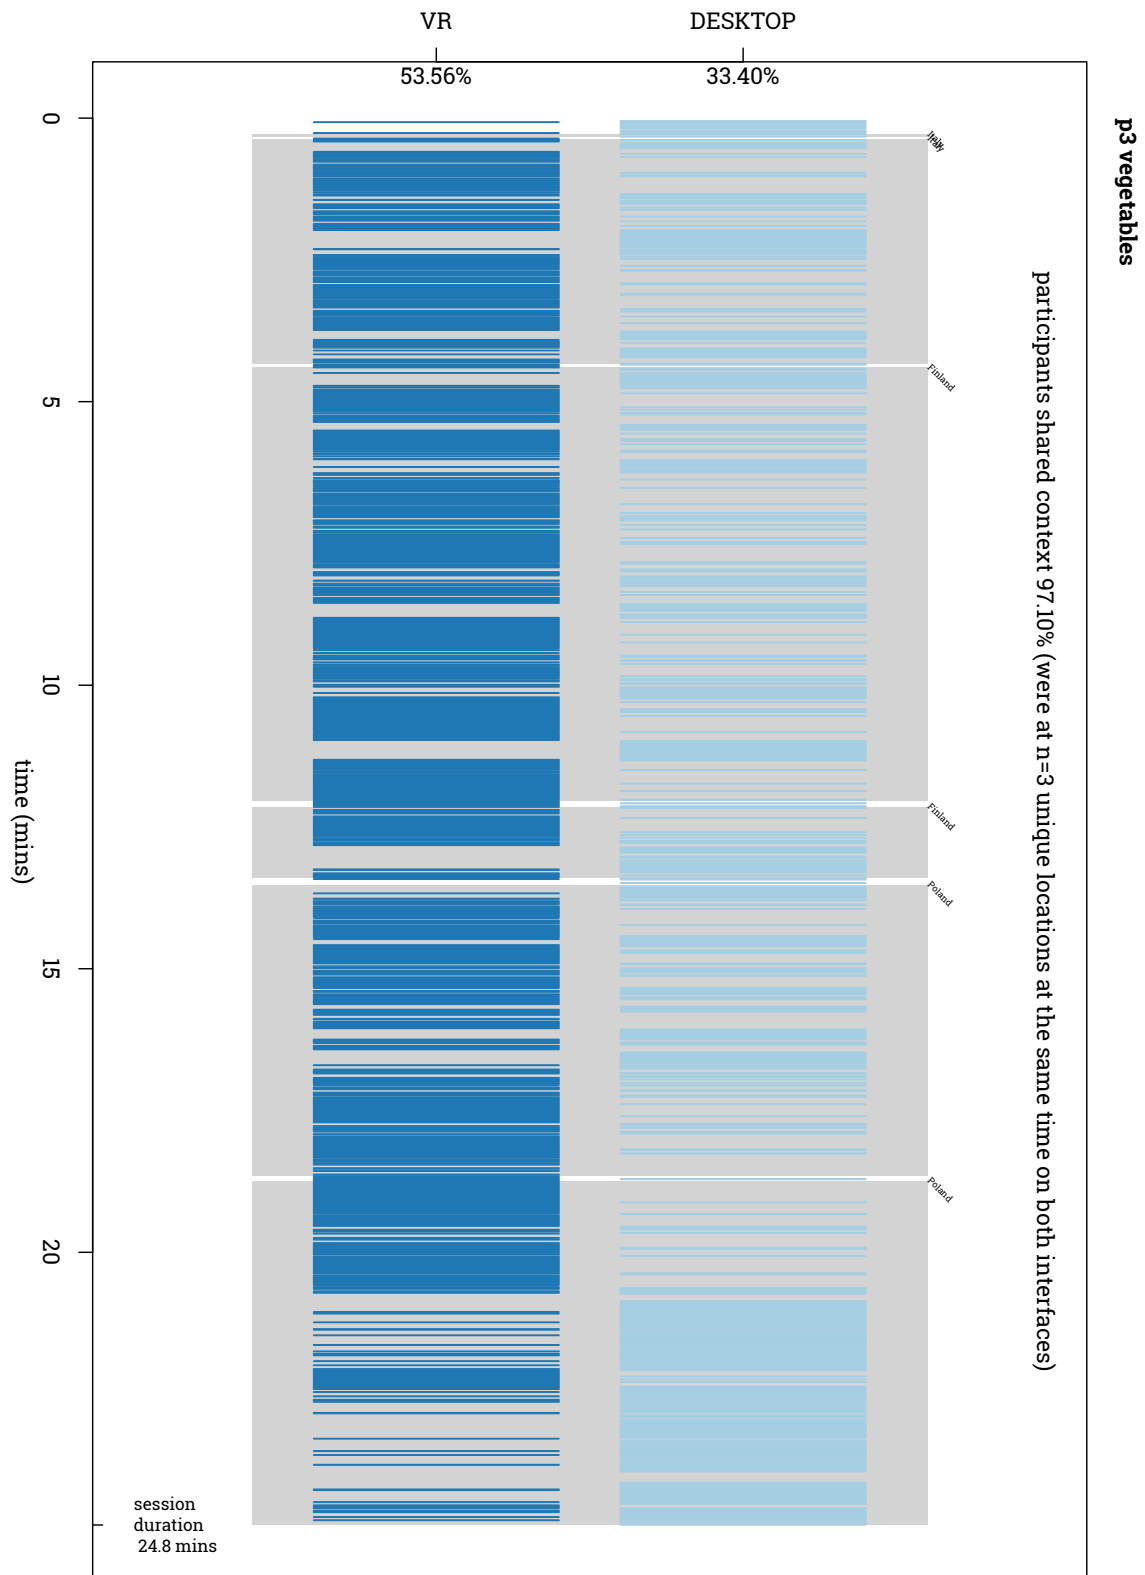

**Figure S12.** Audio activity and shared context analysis for the pair p3, veggies scenario. Dark and light blue rectangles indicate the detected audio activity by the immersive and non-immersive interface users, respectively. The shaded rectangles indicate that the participants were sharing the same context (were at the same location at the same time in both interfaces).

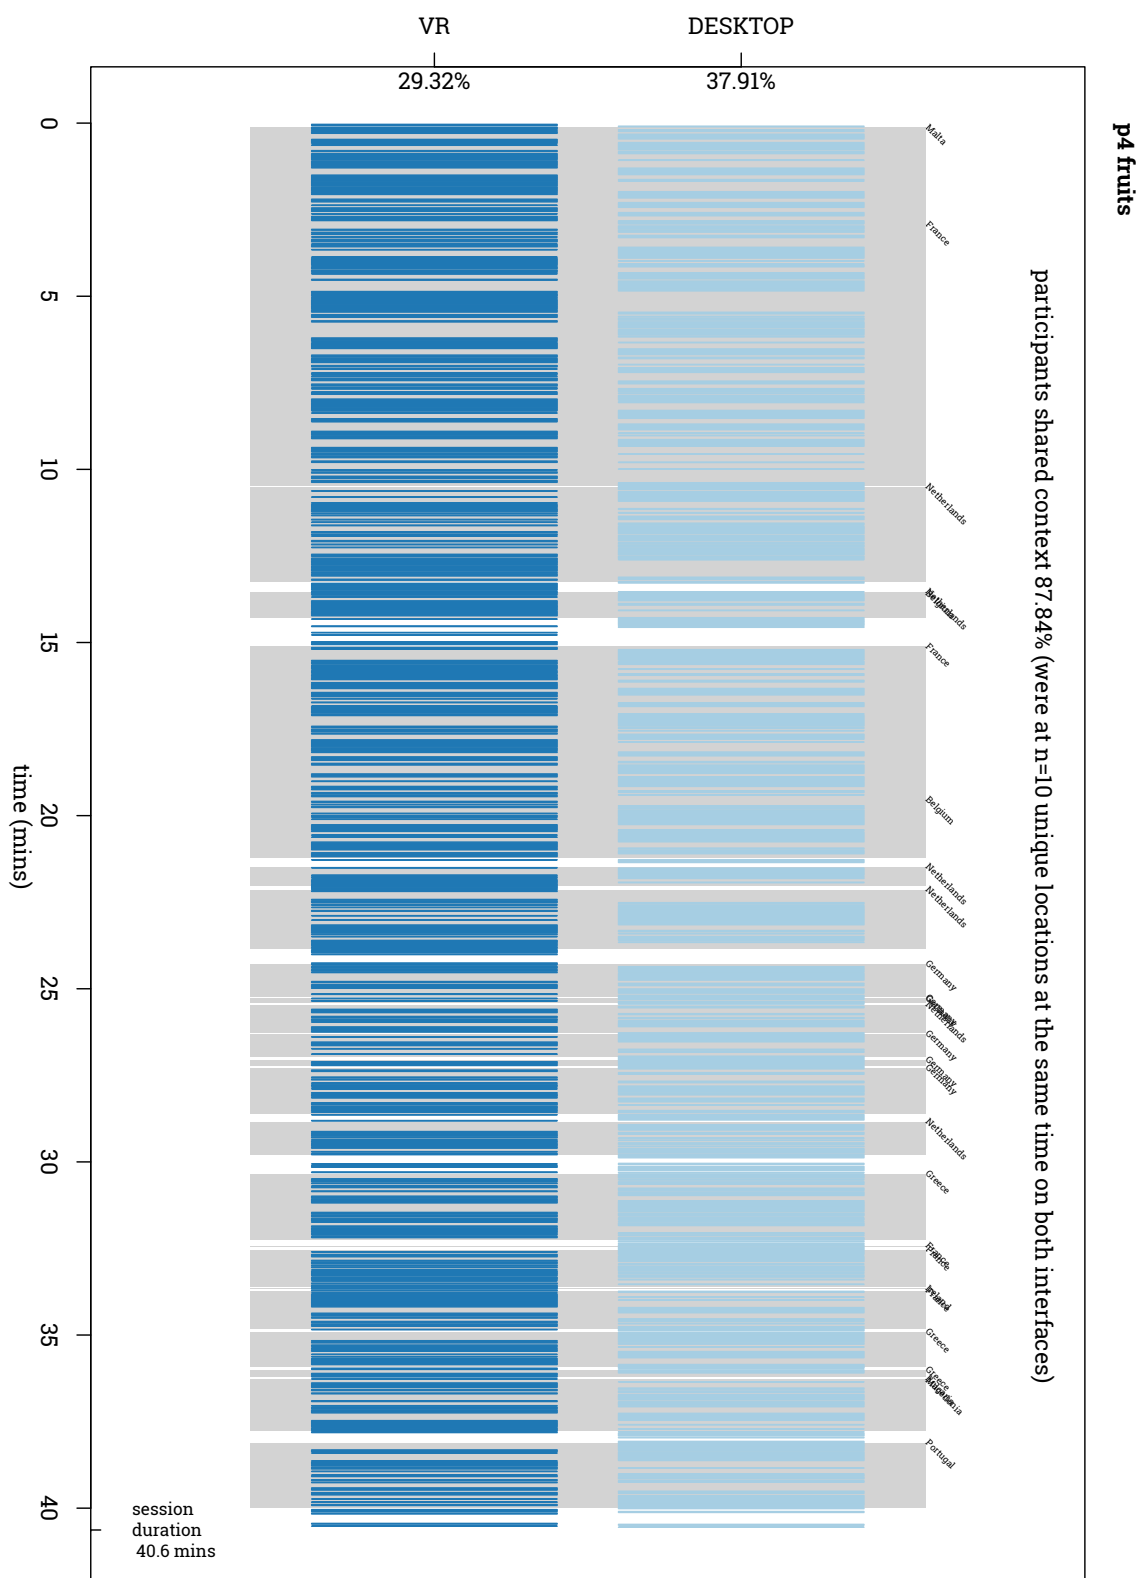

**Figure S13.** Audio activity and shared context analysis for the pair p4, fruits scenario. Dark and light blue rectangles indicate the detected audio activity by the immersive and non-immersive interface users, respectively. The shaded rectangles indicate that the participants were sharing the same context (were at the same location at the same time in both interfaces).

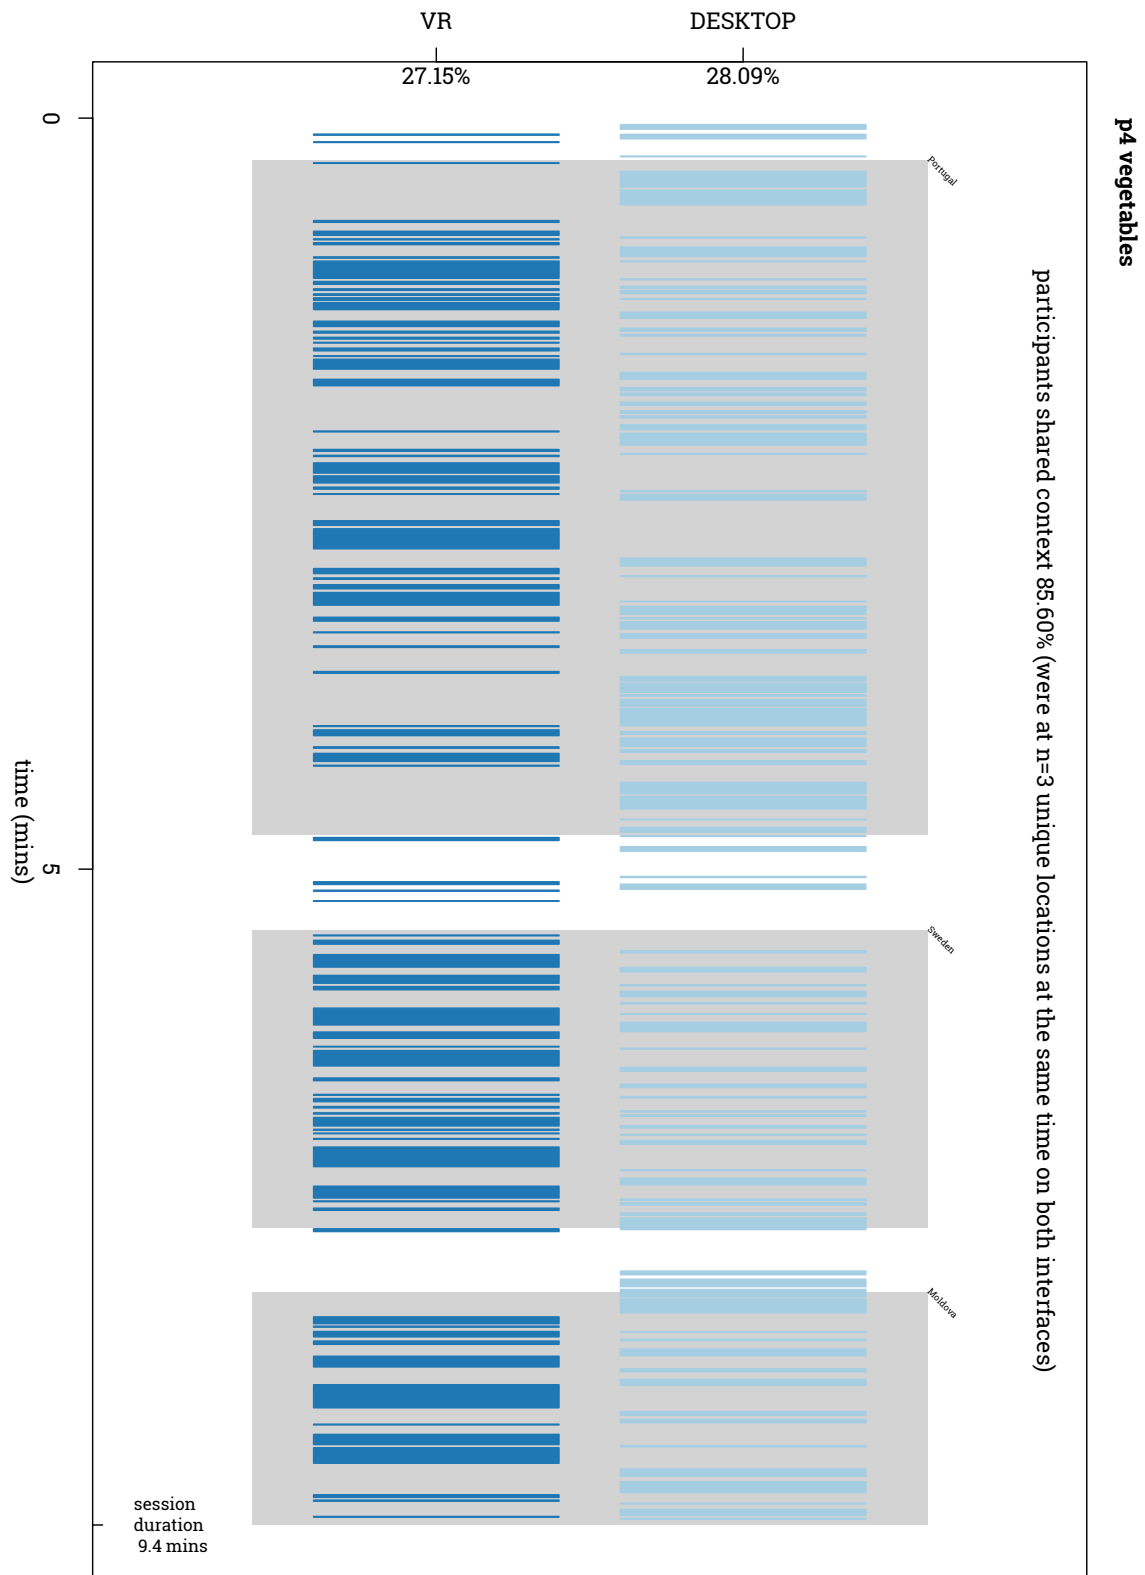

**Figure S14.** Audio activity and shared context analysis for the pair p4, veggies scenario. Dark and light blue rectangles indicate the detected audio activity by the immersive and non-immersive interface users, respectively. The shaded rectangles indicate that the participants were sharing the same context (were at the same location at the same time in both interfaces).

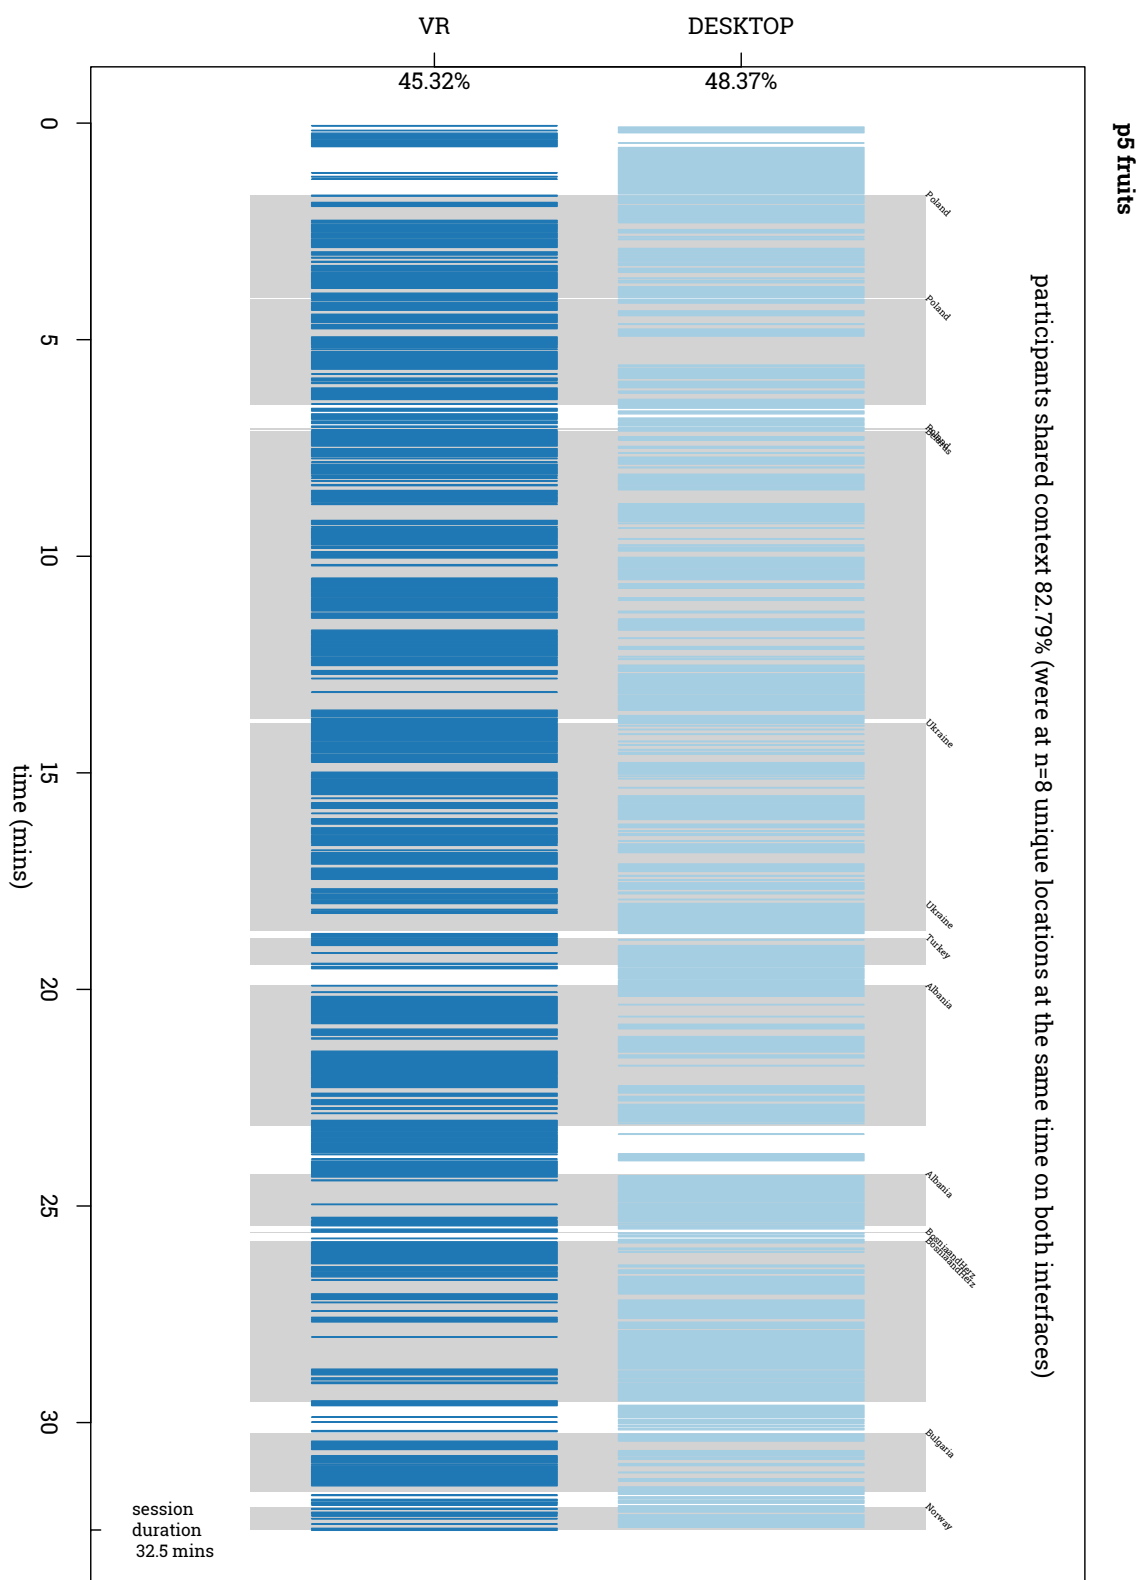

**Figure S15.** Audio activity and shared context analysis for the pair p5, fruits scenario. Dark and light blue rectangles indicate the detected audio activity by the immersive and non-immersive interface users, respectively. The shaded rectangles indicate that the participants were sharing the same context (were at the same location at the same time in both interfaces).



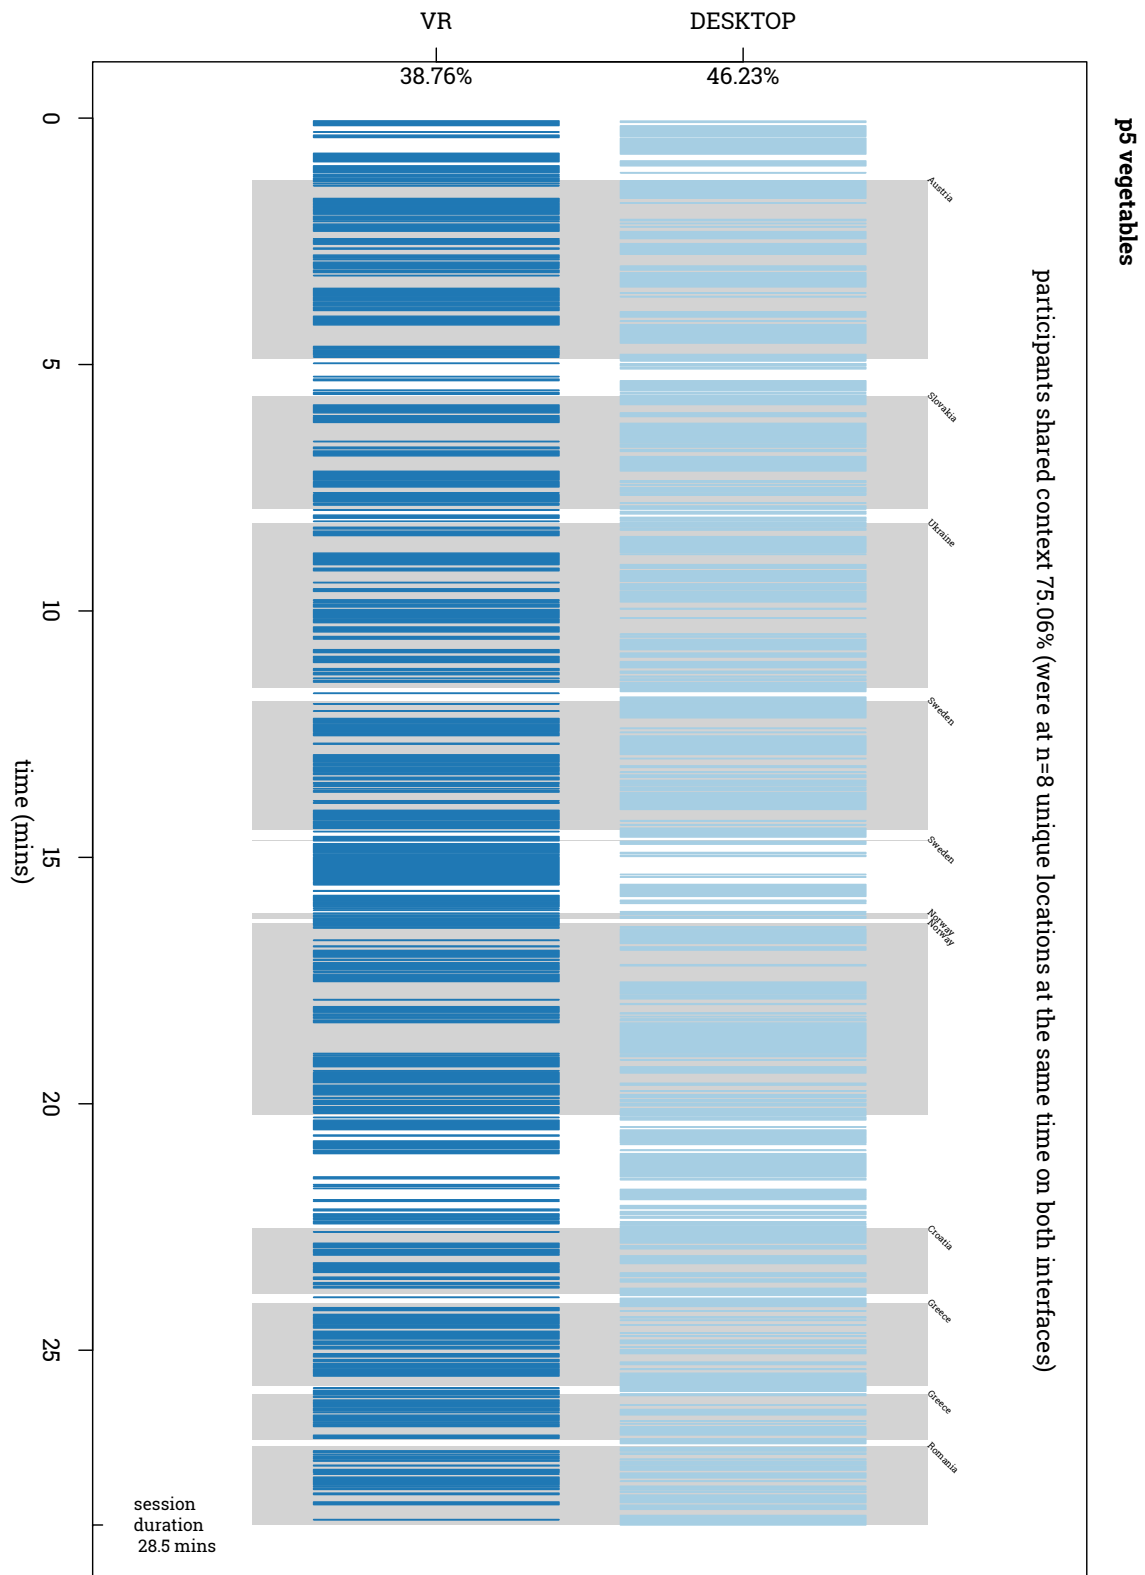

**Figure S16.** Audio activity and shared context analysis for the pair p5, veggies scenario. Dark and light blue rectangles indicate the detected audio activity by the immersive and non-immersive interface users, respectively. The shaded rectangles indicate that the participants were sharing the same context (were at the same location at the same time in both interfaces).

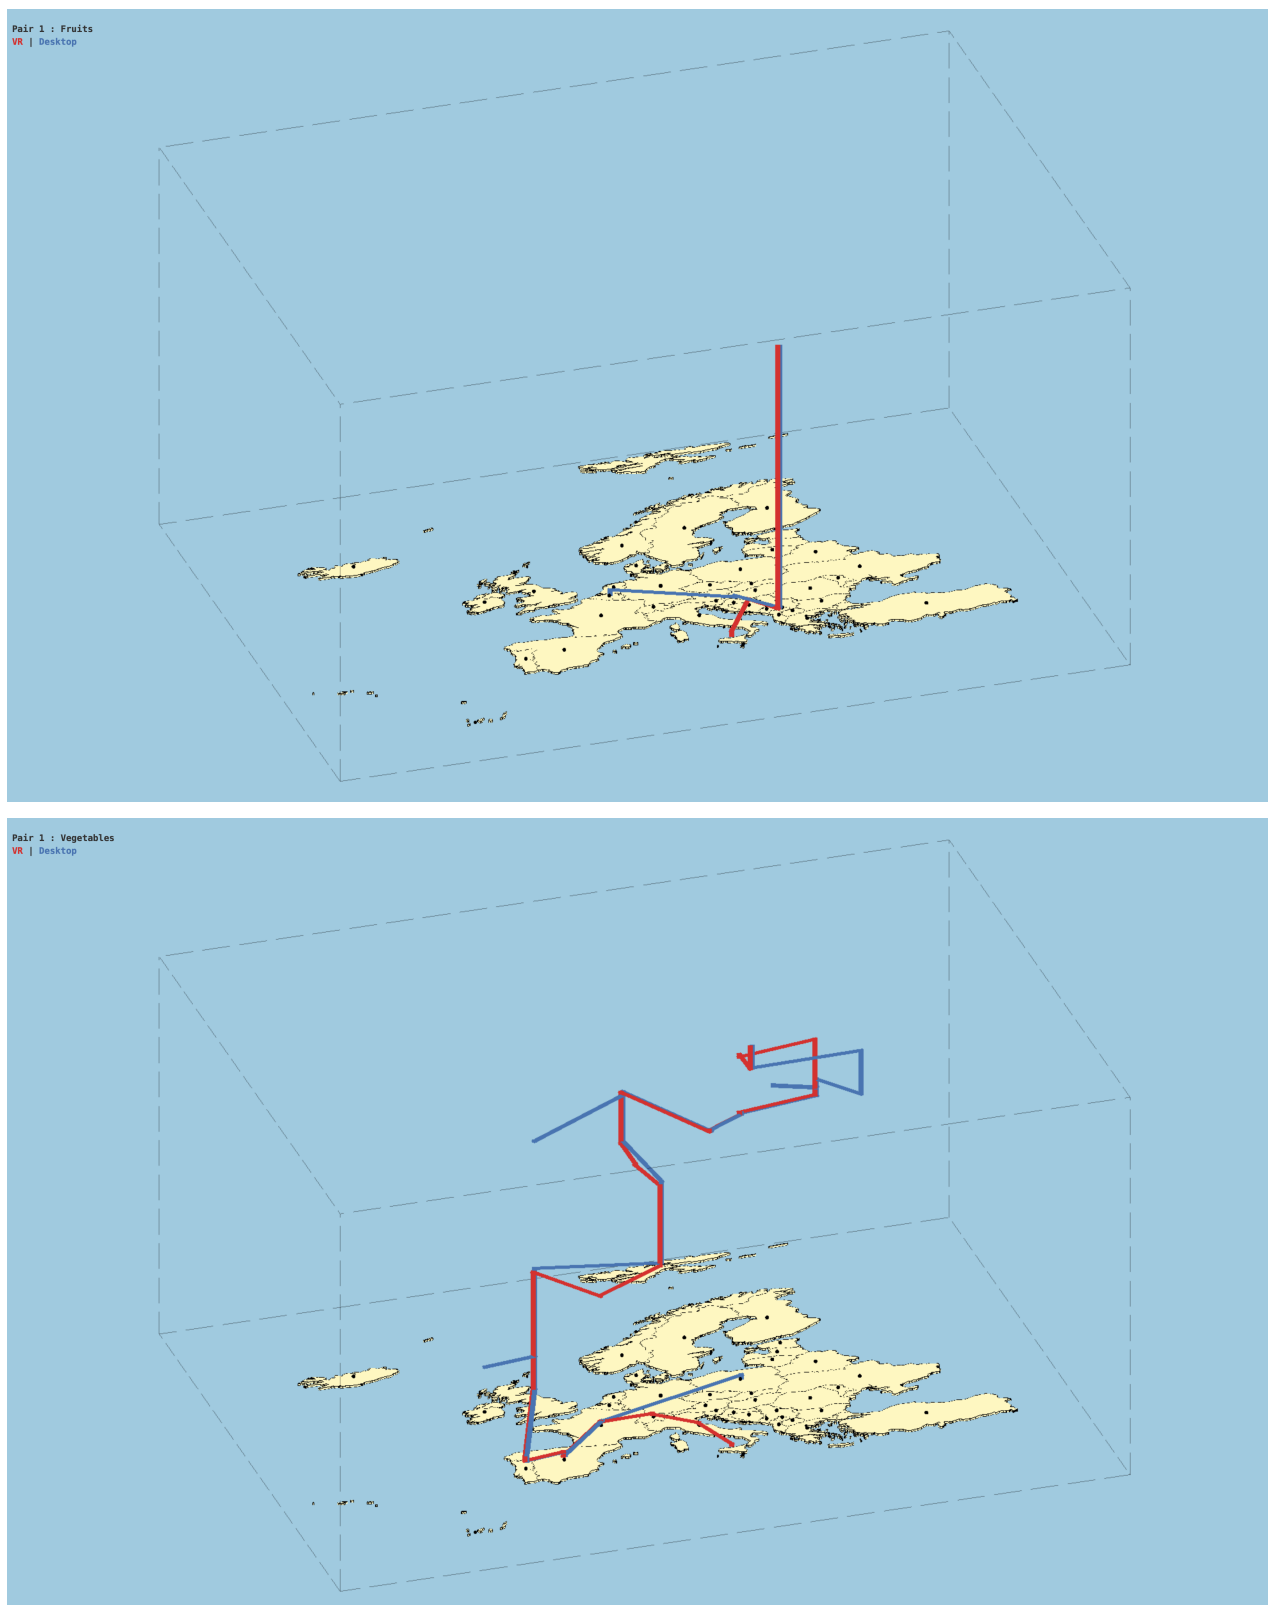

**Figure S17.** Pathway visualization for pair p1, fruits scenario (top), veggies scenario (bottom). The red pathway represents the immersive interface user (VR), while the blue pathway represents the non-immersive interface user (desktop). Online interactive versions at [vrar.lnu.se/apps/2021-frivr/?id=p1f](http://vrar.lnu.se/apps/2021-frivr/?id=p1f) and [vrar.lnu.se/apps/2021-frivr/?id=p1v](http://vrar.lnu.se/apps/2021-frivr/?id=p1v) respectively.

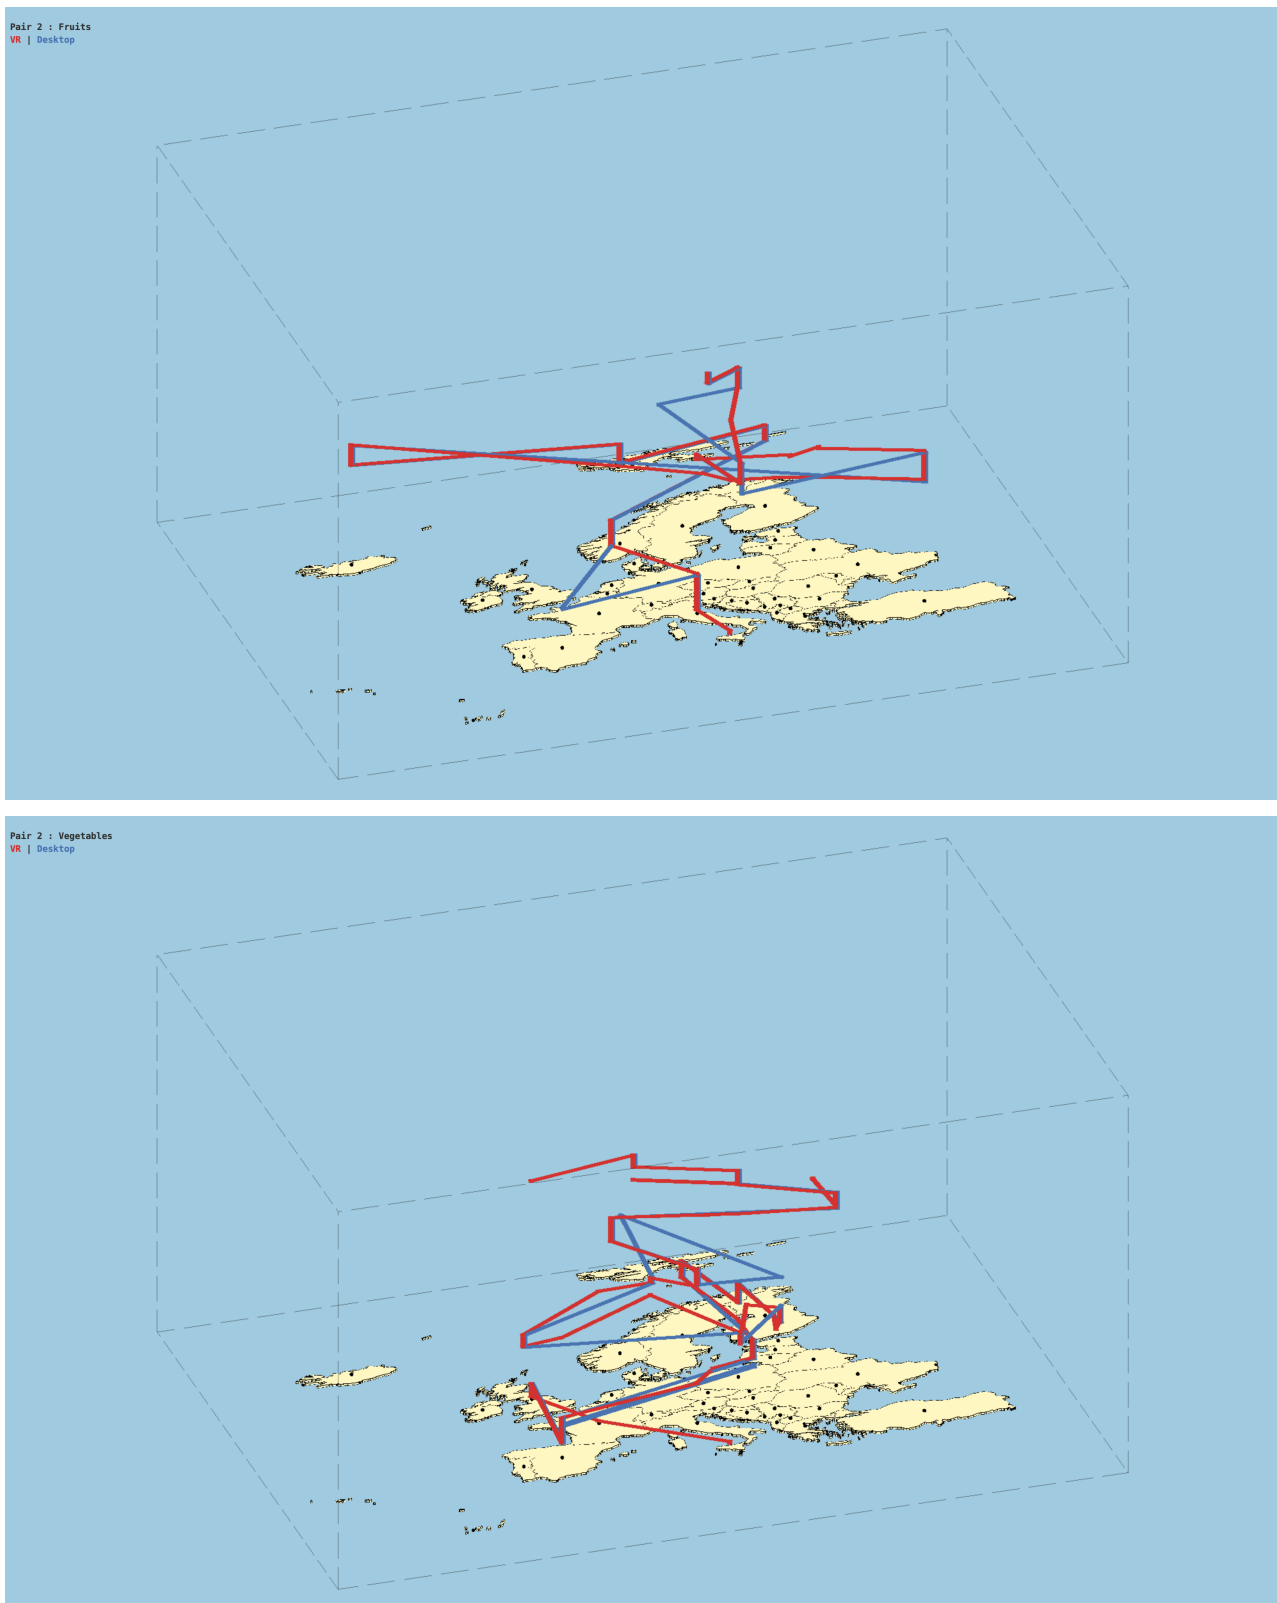

**Figure S18.** Pathway visualization for pair p2, fruits scenario (top), veggies scenario (bottom). The red pathway represents the immersive interface user (VR), while the blue pathway represents the non-immersive interface user (desktop). Online interactive versions at [vrar.lnu.se/apps/2021-frivr/?id=p2f](http://vrar.lnu.se/apps/2021-frivr/?id=p2f) and [vrar.lnu.se/apps/2021-frivr/?id=p2v](http://vrar.lnu.se/apps/2021-frivr/?id=p2v) respectively.

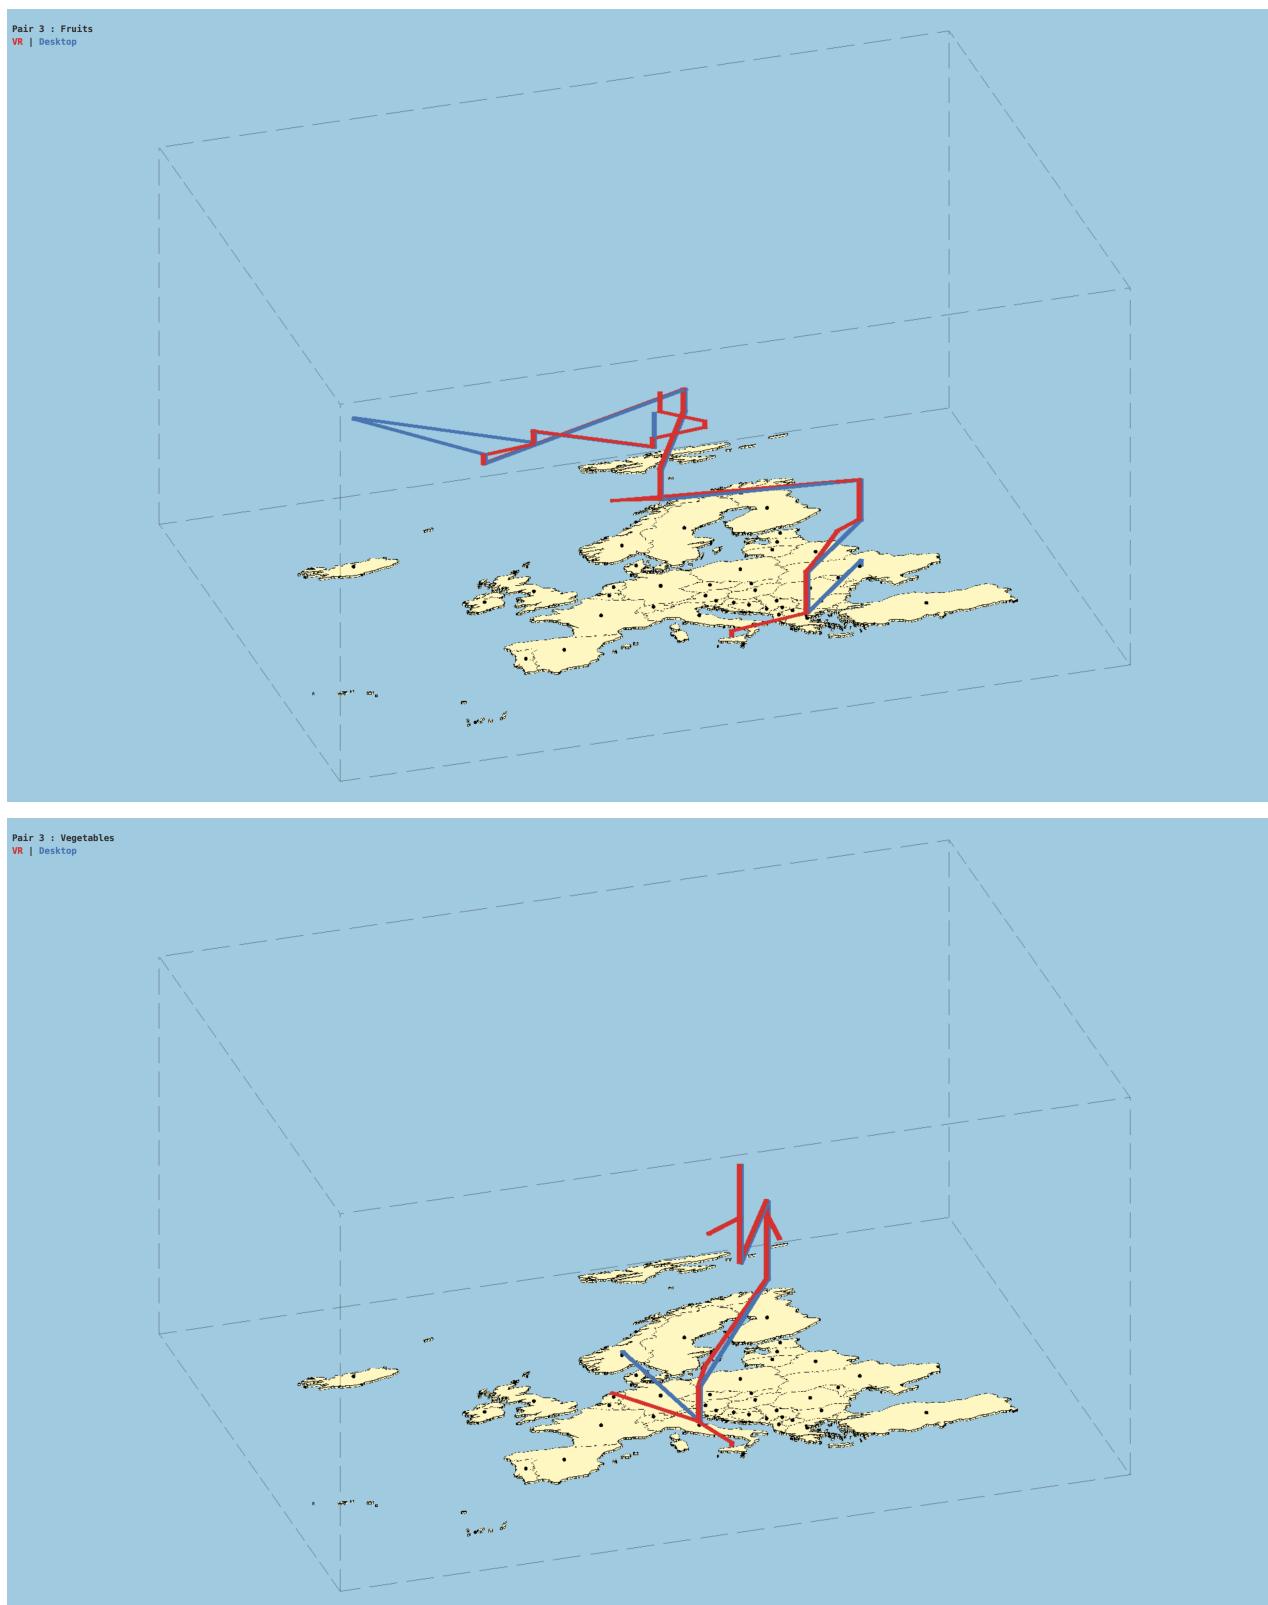

**Figure S19.** Pathway visualization for pair p3, fruits scenario (top), veggies scenario (bottom). The red pathway represents the immersive interface user (VR), while the blue pathway represents the non-immersive interface user (desktop). Online interactive versions at [vrar.lnu.se/apps/2021-frivr/?id=p3f](https://vrar.lnu.se/apps/2021-frivr/?id=p3f) and [vrar.lnu.se/apps/2021-frivr/?id=p3v](https://vrar.lnu.se/apps/2021-frivr/?id=p3v) respectively.

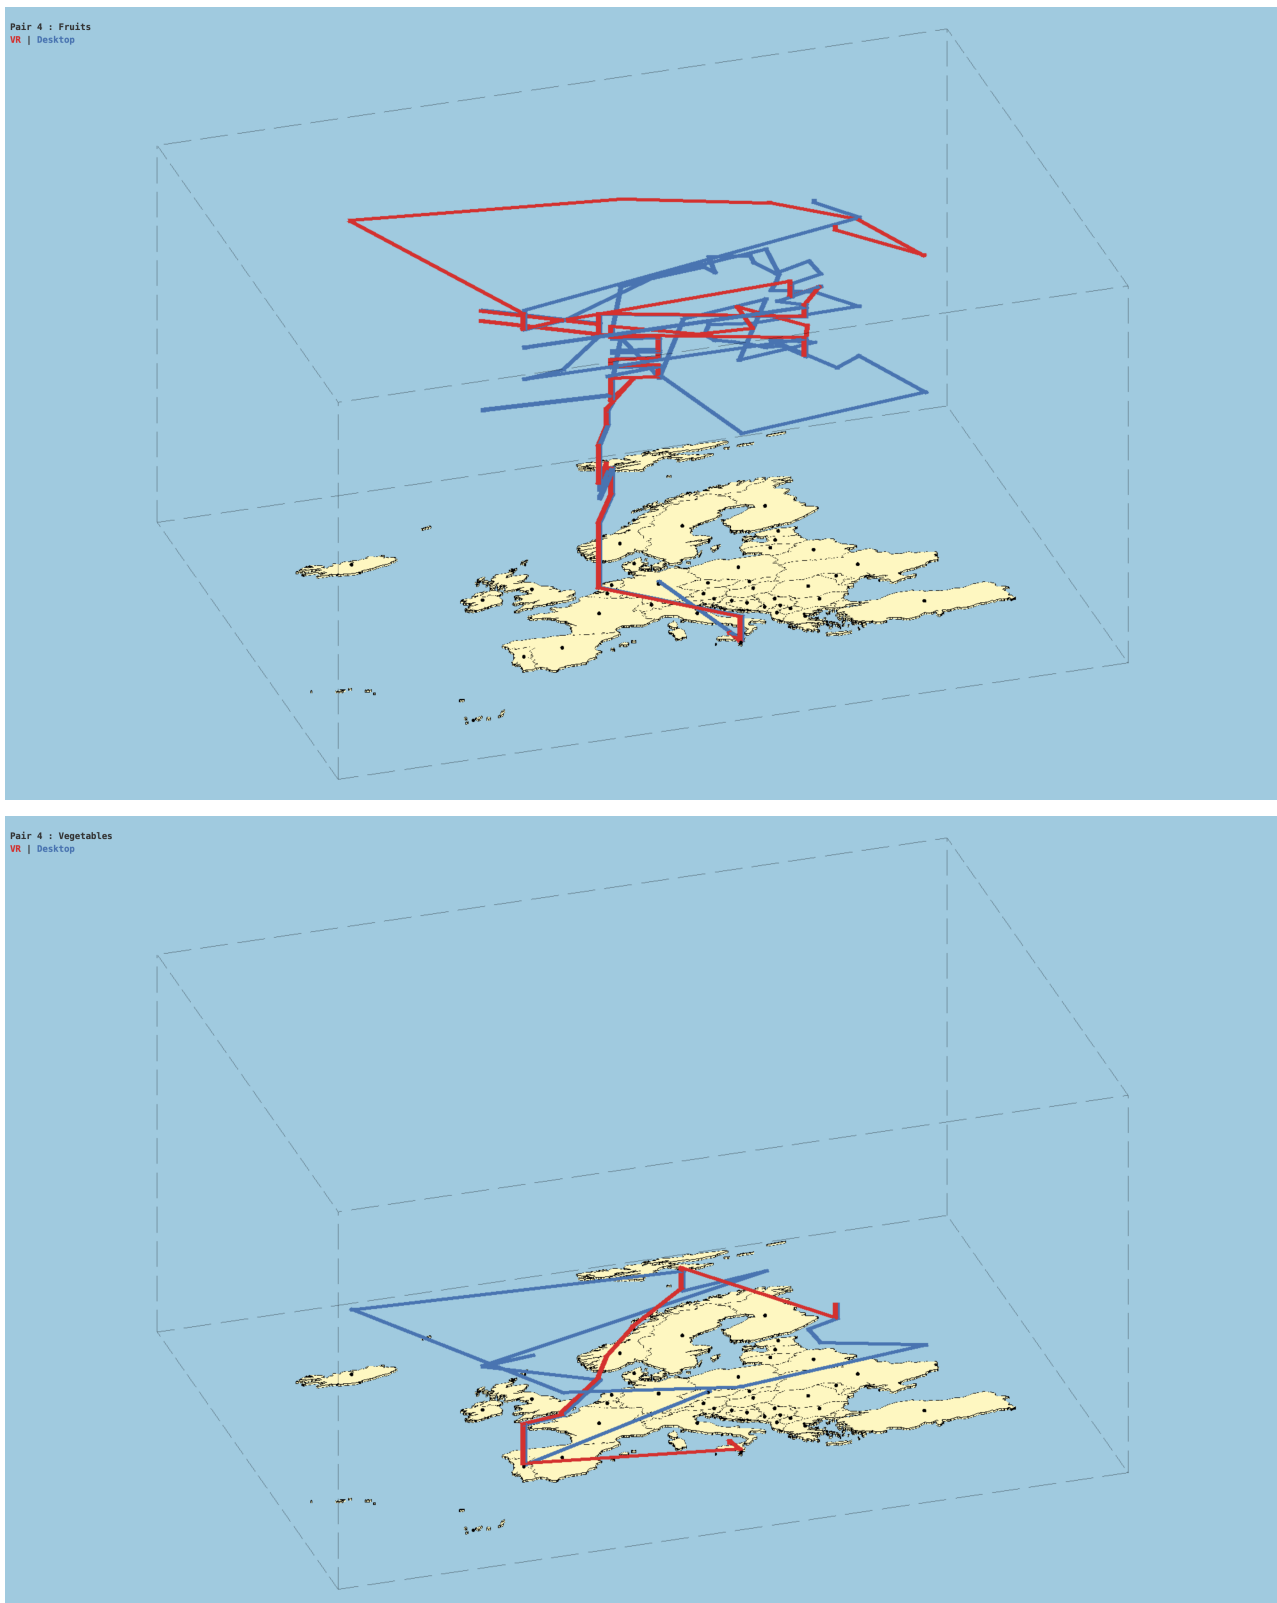

**Figure S20.** Pathway visualization for pair p4, fruits scenario (top), veggies scenario (bottom). The red pathway represents the immersive interface user (VR), while the blue pathway represents the non-immersive interface user (desktop). Online interactive versions at [vrar.lnu.se/apps/2021-frivr/?id=p4f](http://vrar.lnu.se/apps/2021-frivr/?id=p4f) and [vrar.lnu.se/apps/2021-frivr/?id=p4v](http://vrar.lnu.se/apps/2021-frivr/?id=p4v) respectively.

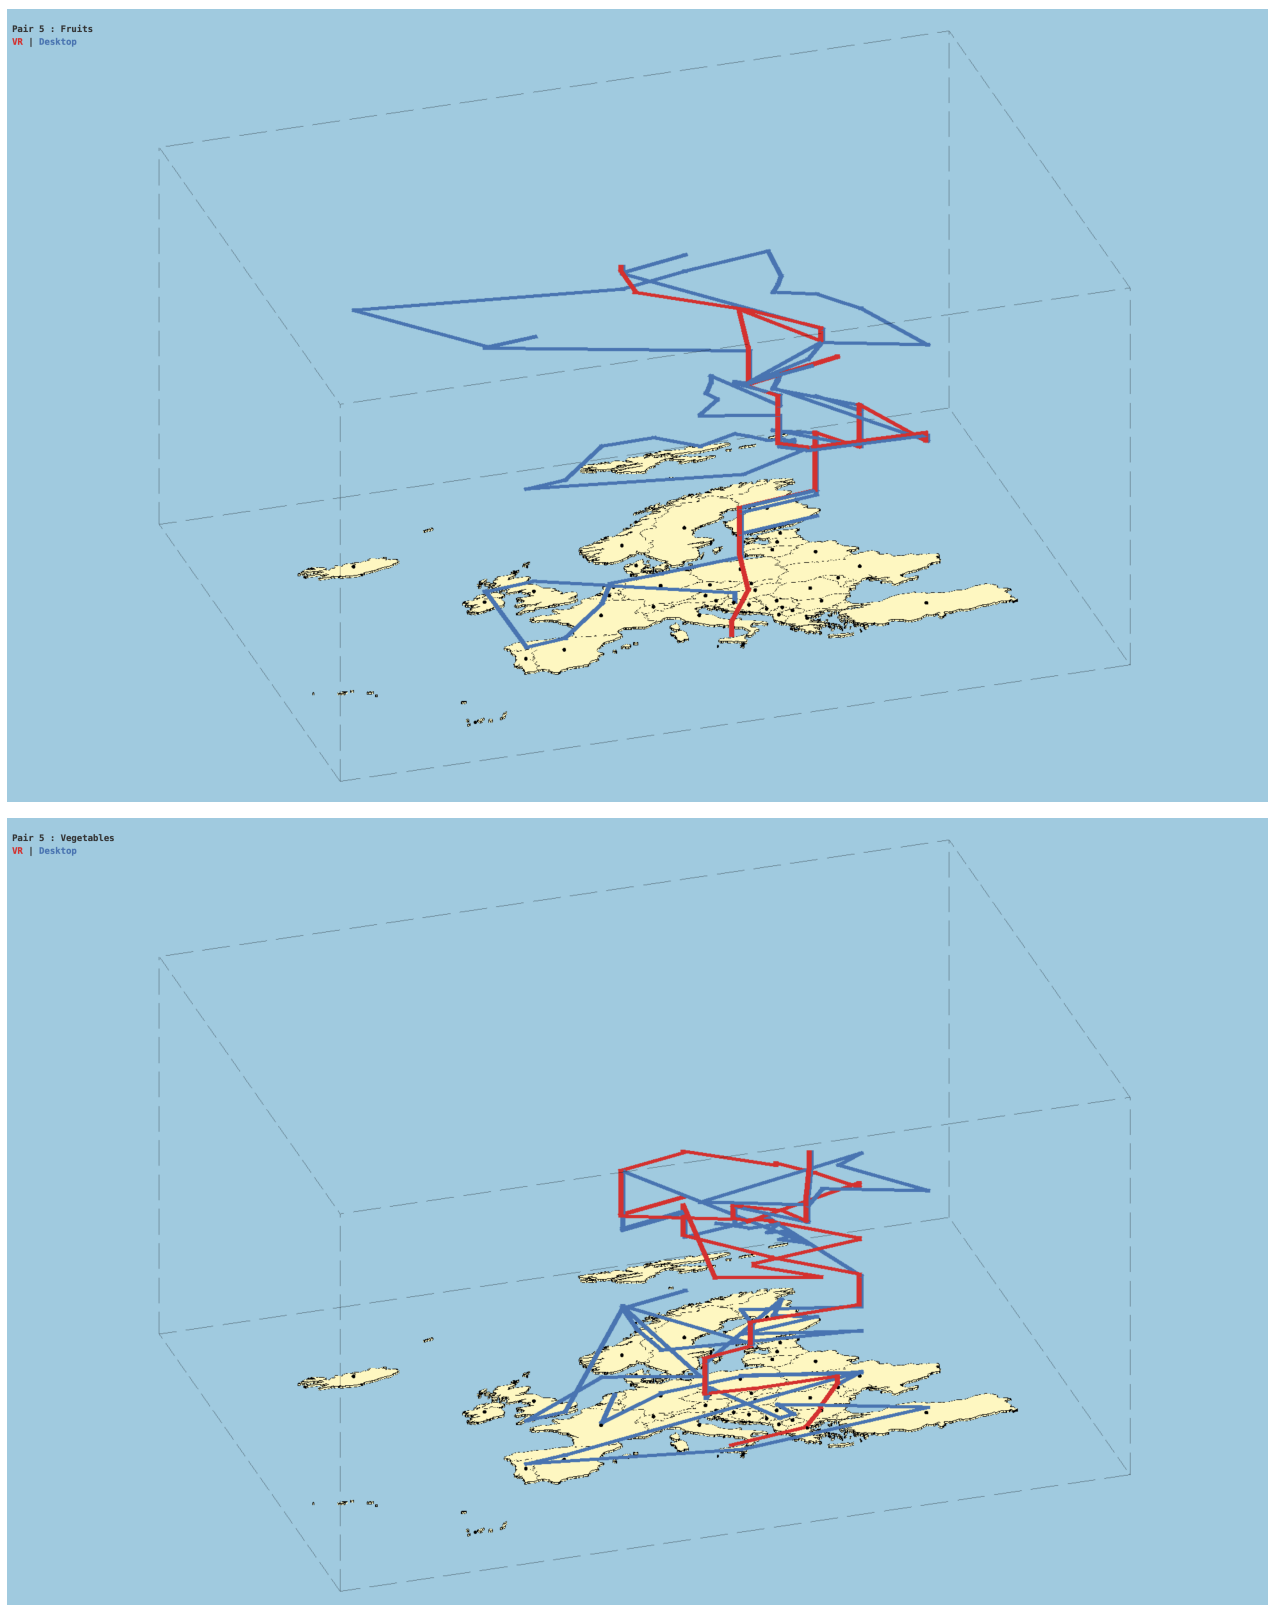

**Figure S21.** Pathway visualization for pair p5, fruits scenario (top), veggies scenario (bottom). The red pathway represents the immersive interface user (VR), while the blue pathway represents the non-immersive interface user (desktop). Online interactive versions at [vrar.lnu.se/apps/2021-frivr/?id=p5f](http://vrar.lnu.se/apps/2021-frivr/?id=p5f) and [vrar.lnu.se/apps/2021-frivr/?id=p5v](http://vrar.lnu.se/apps/2021-frivr/?id=p5v) respectively.
